# Supplementary material for: Targeting Neuraminidase 4 Attenuates Kidney Fibrosis in Mice
Source: Adv Sci (Weinh). 2024 Aug 13;11(39):2406936. doi: 10.1002/advs.202406936 (PMC11497051; doi:10.1002/advs.202406936)
Supplement: Supplementary file 1 — Supporting Information [file ADVS-11-2406936-s001.pdf]

## Supporting Information

for *Adv. Sci.*, DOI 10.1002/adv.202406936

Targeting Neuraminidase 4 Attenuates Kidney Fibrosis in Mice

*Ping-Ting Xiao, Jin-Hua Hao, Yu-Jia Kuang, Cai-Xia Dai, Xiao-Ling Rong, Li-Long Jiang, Zhi-Shen Xie, Lei Zhang\*, Qian-Qian Chen\* and E-Hu Liu\**

**Supporting Information**

**Targeting Neuraminidase 4 Attenuates Kidney Fibrosis in Mice**

*Ping-Ting Xiao, Jin-Hua Hao, Yu-Jia Kuang, Cai-Xia Dai, Xiao-Ling Rong, Li-Long Jiang,  
Zhi-Shen Xie, Lei Zhang<sup>\*</sup>, Qian-Qian Chen<sup>\*</sup>, E-Hu Liu<sup>\*</sup>*

7 **Table S1** Clinical information of the subjects.

| Characteristics                     | Renal Fibrosis ( <i>n</i> = 5) | Non-Renal Fibrosis ( <i>n</i> = 4) | <i>p</i> value |
|-------------------------------------|--------------------------------|------------------------------------|----------------|
| Age (years)                         | 41.6±12.7                      | 23.25±10.3                         | 0.05272        |
| Male ( <i>n</i> , %)                | 3 (20%)                        | 1 (25%)                            | 0.35582        |
| SCr (μmol/L)                        | 212.96±60.03                   | 54.5±12.71                         | 0.001368       |
| BUN (mmol/L)                        | 9.38±3.92                      | 3.65±0.98                          | 0.025749       |
| eGFR (mL/(min*1.73m <sup>2</sup> )) | 30.79±9.26                     | 129.34±17.21                       | 3.71E-05       |
| Comorbidities/Medical history       |                                |                                    |                |
| Hypertension                        | 3 (60%)                        | 0                                  |                |
| Diabetes mellitus                   | 0                              | 0                                  |                |
| COPD or asthma                      | 1 (25%)                        | 0                                  |                |
| Coronary disease                    | 0                              | 0                                  |                |
| Morbid obesity                      | 0                              | 0                                  |                |
| Neurologic                          | 1 (25%)                        | 0                                  |                |
| Neoplasms (extra-renal)             | 0                              | 0                                  |                |

8 Unpaired two-tailed *t*-test. SCr: serum creatinine; BUN: Blood urea nitrogen. eGFR: Estimated glomerular filtration rate; COPD: chronic  
9 obstructive pulmonary disease.

10 **Table S2** The inhibitory rate of 67 compounds on NEU4 enzyme activity.

| ID | Natural compound                    | Inhibition ratio $\pm$ SD | Source                      | Structure                                                                             |
|----|-------------------------------------|---------------------------|-----------------------------|---------------------------------------------------------------------------------------|
| 1  | 3,5,6,7,8,3',4'-Heptamethoxyflavone | 44.6% $\pm$ 0.016         | Biopurify<br>Phytochemicals | 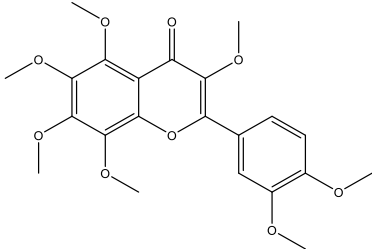   |
| 2  | Didymin                             | 10.9% $\pm$ 0.01          | Biopurify<br>Phytochemicals | 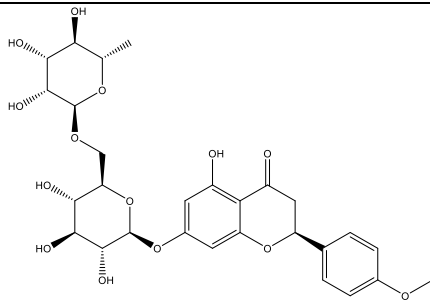   |
| 3  | Narirutin                           | 14.7% $\pm$ 0.023         | Biopurify<br>Phytochemicals | 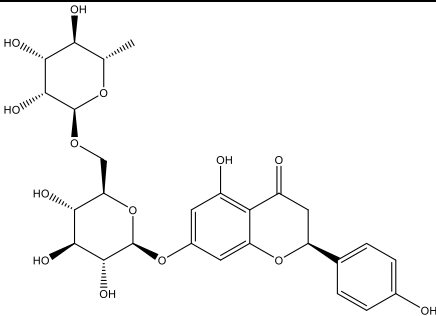 |
| 4  | Naringin                            | 16.9% $\pm$ 0.03          | Must bio-technology         | 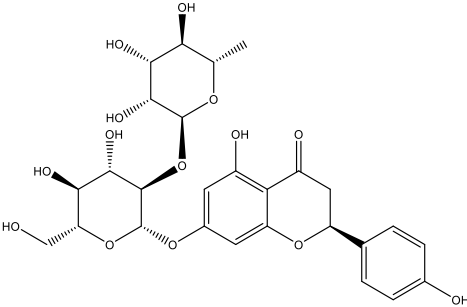  |

|   |               |             |                            |                                                                                       |
|---|---------------|-------------|----------------------------|---------------------------------------------------------------------------------------|
| 5 | Synephrine    | 22.5%±0.074 | Must bio-technology        | 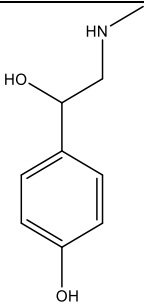    |
| 6 | Neohesperidin | 27.5%±0.009 | Prepared in our laboratory | 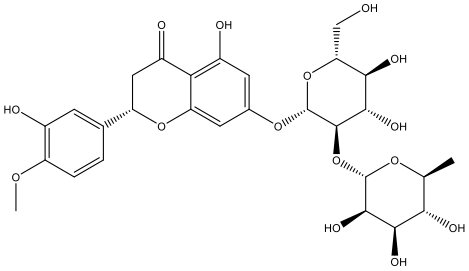    |
| 7 | Hesperidin    | 25.7%±0.013 | Must bio-technology        | 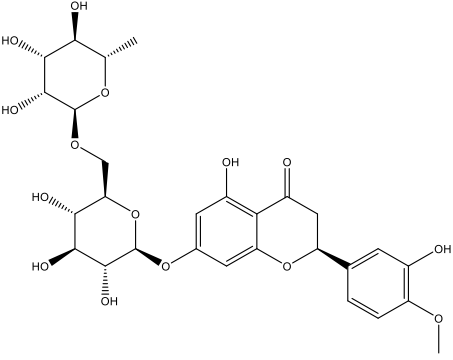   |
| 8 | Berberine     | 15.6%±0.024 | Must bio-technology        | 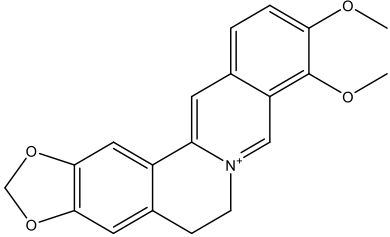 |

|    |                  |             |                     |                                                                                       |
|----|------------------|-------------|---------------------|---------------------------------------------------------------------------------------|
| 9  | Macranthoidin B  | 6.4%±0.033  | Must bio-technology | 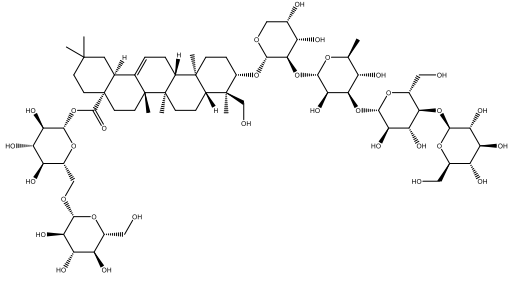    |
| 10 | Ginsenoside Rg1  | 2.1%±0.014  | Must bio-technology | 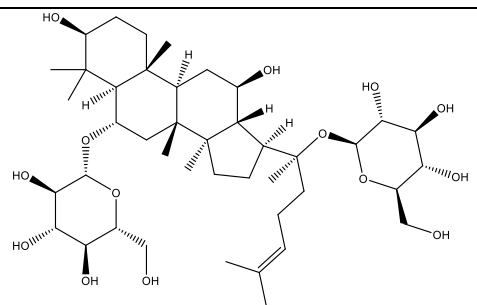    |
| 11 | Cryptotanshinone | 6.4%±0.032  | Must bio-technology | 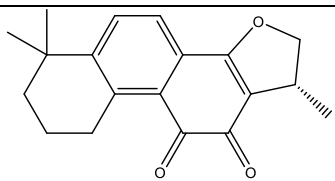  |
| 12 | Catechin         | 16.2%±0.008 | Must bio-technology | 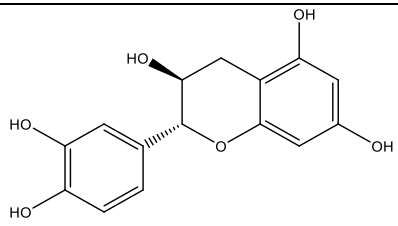 |

|    |                 |             |                     |                                                                                      |
|----|-----------------|-------------|---------------------|--------------------------------------------------------------------------------------|
| 13 | Jatrorrhizine   | 15.6%±0.04  | Must bio-technology | 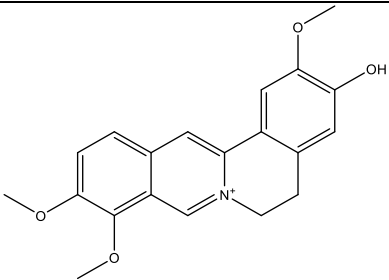  |
| 14 | Ginsenoside Re  | 7.6%±0.012  | Must bio-technology | 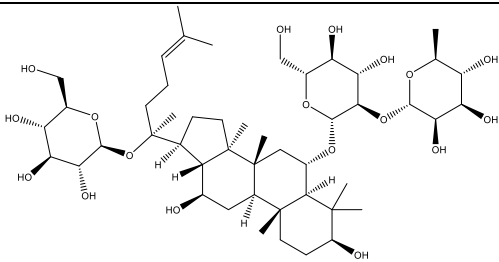   |
| 15 | Ginsenoside Rd  | 11.3%±0.009 | Must bio-technology | 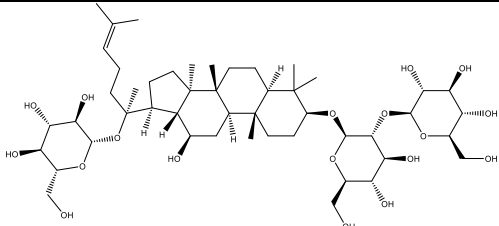  |
| 16 | Astragaloside A | 10.5%±0.02  | Must bio-technology | 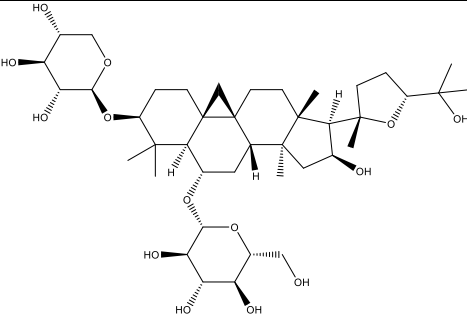 |

|    |              |               |                     |                                                                                       |
|----|--------------|---------------|---------------------|---------------------------------------------------------------------------------------|
| 17 | Sesamin      | 13.9%±0.018   | Must bio-technology | 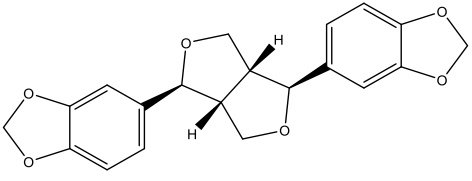    |
| 18 | Limonin      | 10.6%±30.011  | Must bio-technology | 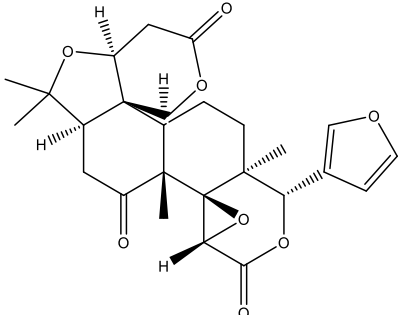   |
| 19 | Alpinetin    | 14.1%±0.04    | Must bio-technology | 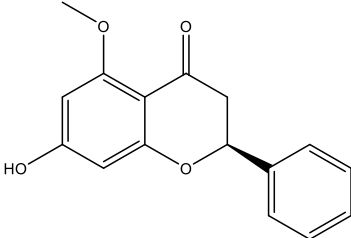  |
| 20 | Magnoflorine | -182.4%±0.198 | Must bio-technology | 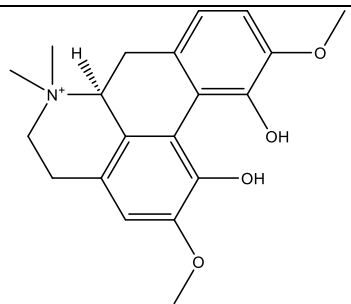 |

|    |                       |             |                     |                                                                                      |
|----|-----------------------|-------------|---------------------|--------------------------------------------------------------------------------------|
| 21 | Schisandrin           | 7.4%±0.013  | Must bio-technology | 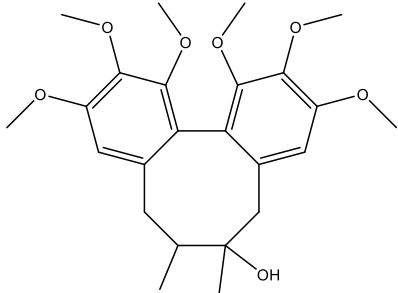  |
| 22 | Tanshinone II A       | 3.3%±0.013  | Must bio-technology | 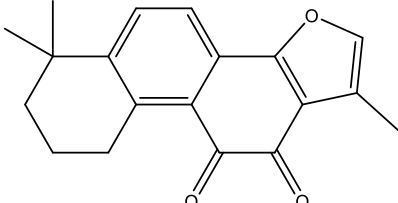  |
| 23 | Dihydrotanshinone I   | 17.5%±0.02  | Must bio-technology | 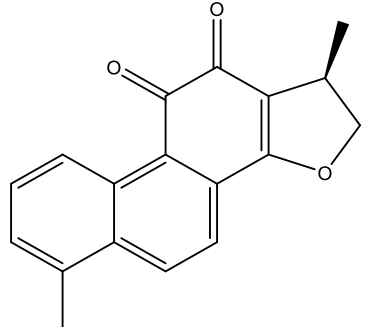 |
| 24 | Isochlorogenic acid A | 39.5%±0.103 | Must bio-technology | 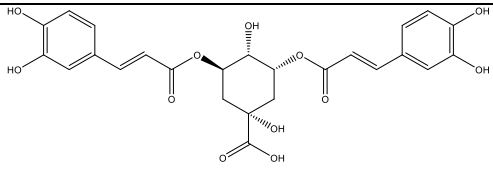 |

|    |             |             |                     |                                                                                      |
|----|-------------|-------------|---------------------|--------------------------------------------------------------------------------------|
| 25 | Daidzin     | 43.9%±0.036 | Must bio-technology | 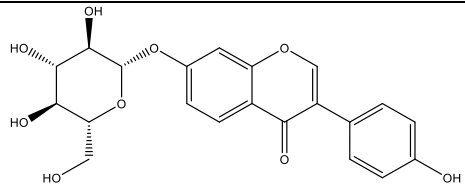   |
| 26 | Tannic acid | -25.0%±0.03 | Must bio-technology | 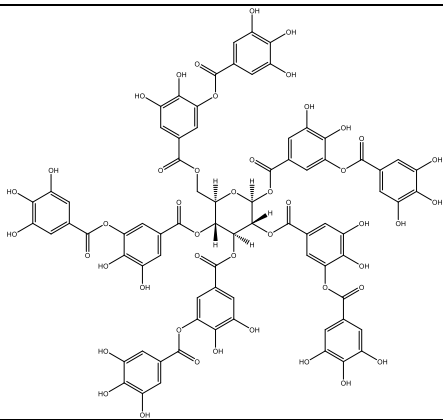  |
| 27 | Glabridin   | 10.2%±0.038 | Must bio-technology | 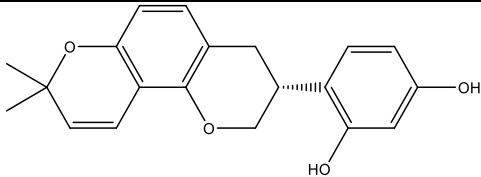 |
| 28 | Genistin    | 19.3%±0.04  | Must bio-technology | 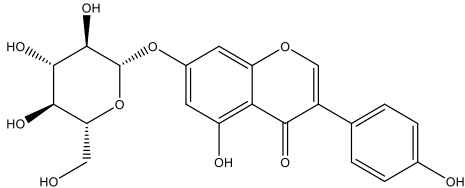 |

|    |                           |             |                     |                                                                                      |
|----|---------------------------|-------------|---------------------|--------------------------------------------------------------------------------------|
| 29 | Daidzein                  | 34.6%±0.053 | Must bio-technology | 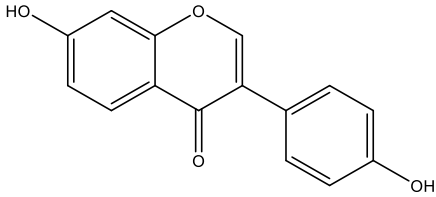  |
| 30 | Stachydrine hydrochloride | 4.9%±0.047  | Must bio-technology | 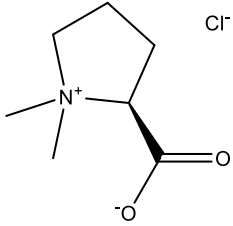  |
| 31 | Dauricine                 | 29.9%±0.088 | Must bio-technology | 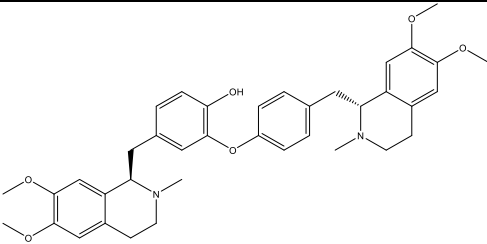  |
| 32 | Shionone                  | 1.7%±0.059  | Must bio-technology | 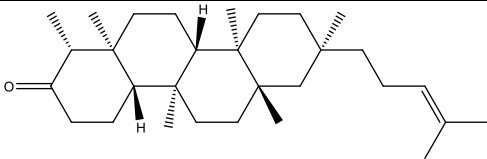 |

|    |             |              |                     |                                                                                       |
|----|-------------|--------------|---------------------|---------------------------------------------------------------------------------------|
| 33 | Betaine     | 2.8%±0.059   | Must bio-technology | 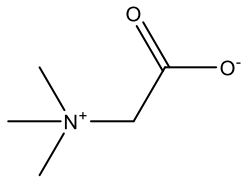   |
| 34 | Cimifugin   | -24.9%±0.026 | Must bio-technology | 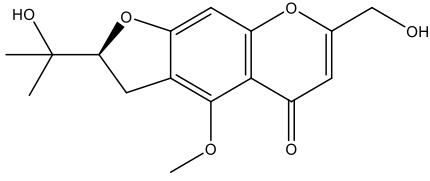   |
| 35 | Bergapten   | 23.3%±0.024  | Must bio-technology | 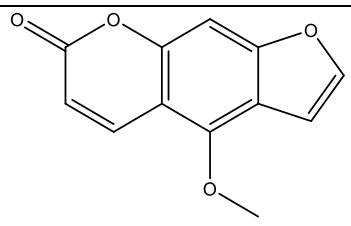  |
| 36 | Costunolide | 15.2%±0.014  | Must bio-technology | 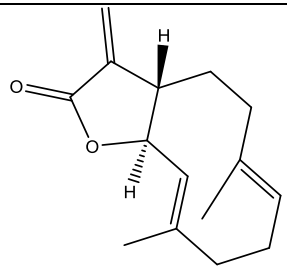 |

|    |             |               |                     |                                                                                      |
|----|-------------|---------------|---------------------|--------------------------------------------------------------------------------------|
| 37 | Icaritin    | 19.6%±0.022   | Must bio-technology | 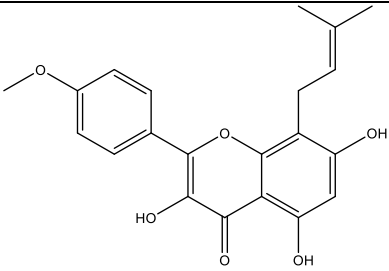  |
| 38 | Veratramine | 19.2%±0.011   | Must bio-technology | 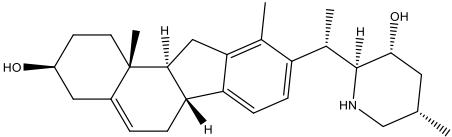   |
| 39 | Scopoletin  | -891.1%±0.242 | Must bio-technology | 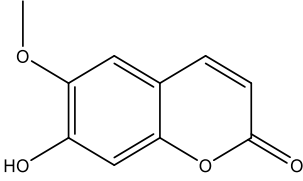 |
| 40 | 6-Gingerol  | 9.9%±0.032    | Must bio-technology | 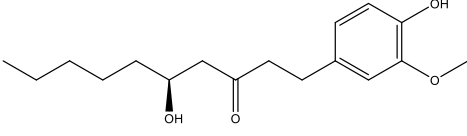 |

|    |                       |             |                     |                                                                                       |
|----|-----------------------|-------------|---------------------|---------------------------------------------------------------------------------------|
| 41 | Dehydrocostus lactone | 17.9%±0.019 | Must bio-technology | 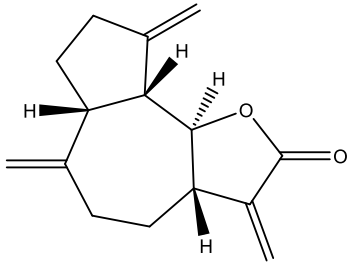   |
| 42 | Loganic acid          | -5.2%±0.012 | Must bio-technology | 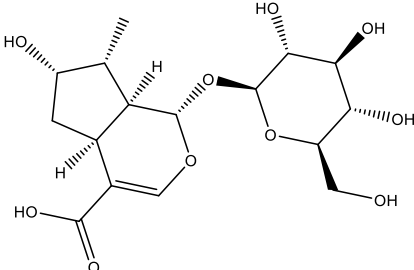   |
| 43 | Aloe emodin           | 25.9%±0.208 | Must bio-technology | 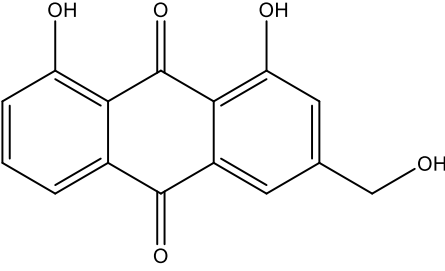   |
| 44 | Psoralen              | 29.8%±0.012 | Must bio-technology | 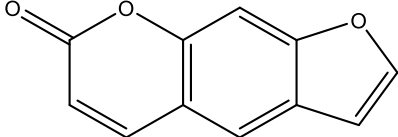 |

|    |                 |             |                     |                                                                                      |
|----|-----------------|-------------|---------------------|--------------------------------------------------------------------------------------|
| 45 | Gastrodin       | 3.6%±0.023  | Must bio-technology | 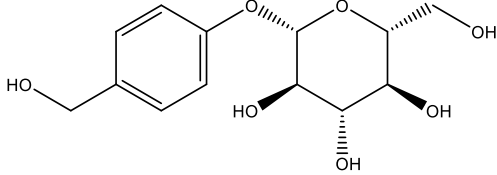   |
| 46 | Macranthoside B | 10.9%±0.033 | Must bio-technology | 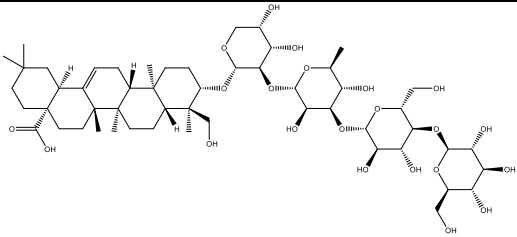   |
| 47 | Baicalin        | 32.1%±0.033 | Must bio-technology | 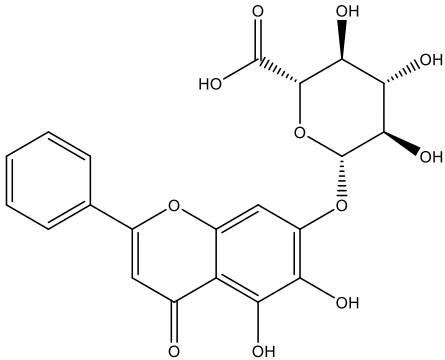  |
| 48 | Saikosaponin    | 3.9%±0.045  | Must bio-technology | 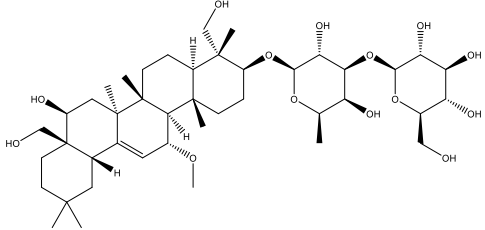 |

|    |               |             |                     |                                                                                       |
|----|---------------|-------------|---------------------|---------------------------------------------------------------------------------------|
| 49 | Curcumol      | 6.9%±0.004  | Must bio-technology | 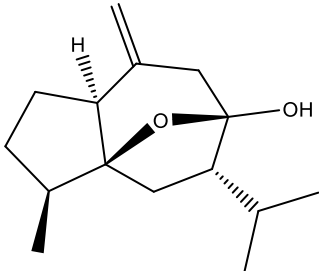   |
| 50 | Alantolactone | 12.4%±0.021 | Must bio-technology | 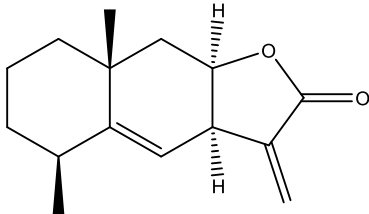   |
| 51 | Parthenolide  | 15.1%±0.014 | Must bio-technology | 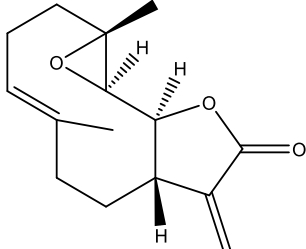  |
| 52 | Diosmetin     | 17.5%±0.025 | Must bio-technology | 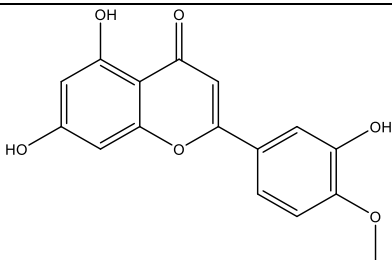 |

|    |               |                  |                     |                                                                                       |
|----|---------------|------------------|---------------------|---------------------------------------------------------------------------------------|
| 53 | Carnosic acid | 35.2%±0.004      | Must bio-technology | 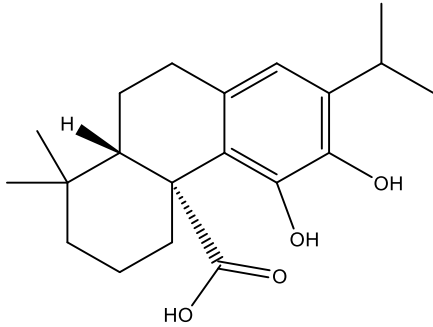   |
| 54 | Salidroside   | 1.1%±0.011       | Must bio-technology | 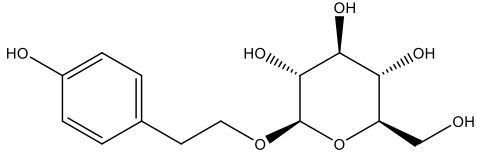    |
| 55 | Esculin       | -1054.69%±12.193 | Must bio-technology | 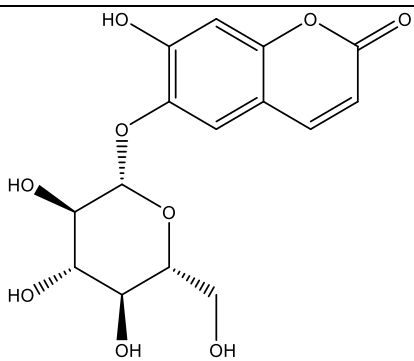  |
| 56 | Evodiamine    | -18.3%±0.087     | Must bio-technology | 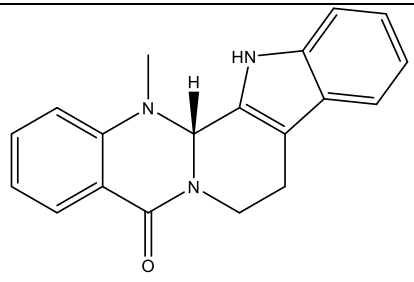 |

|    |                    |             |                     |                                                                                      |
|----|--------------------|-------------|---------------------|--------------------------------------------------------------------------------------|
| 57 | Deoxyschizandrin   | 1.4%±0.039  | Must bio-technology | 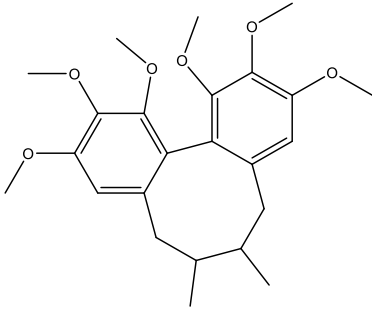  |
| 58 | Sipeimine          | 1%±0.01     | Must bio-technology | 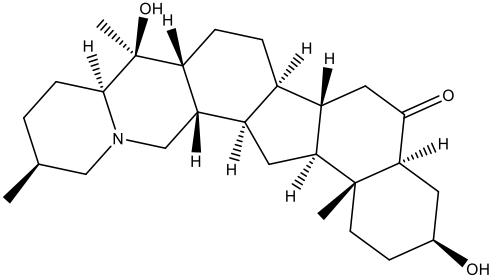   |
| 59 | Notoginsenoside R1 | -1.5%±0.008 | Must bio-technology | 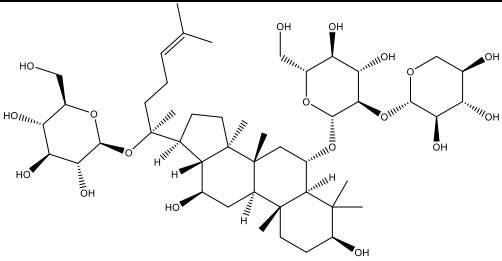  |
| 60 | Glycyrrhizic acid  | 6.8%±0.019  | Must bio-technology | 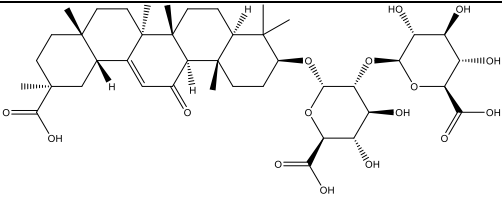 |

|    |                 |             |                     |                                                                                       |
|----|-----------------|-------------|---------------------|---------------------------------------------------------------------------------------|
| 61 | Isorhamnetin    | 22%±0.022   | Must bio-technology | 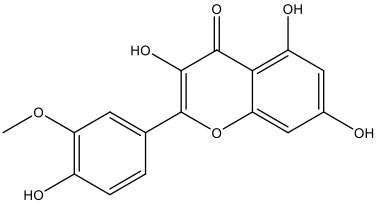   |
| 62 | Apigenin        | 27.8%±0.010 | Must bio-technology | 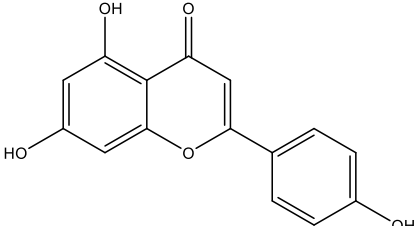   |
| 63 | Nuciferine      | 14.1%±0.018 | Must bio-technology | 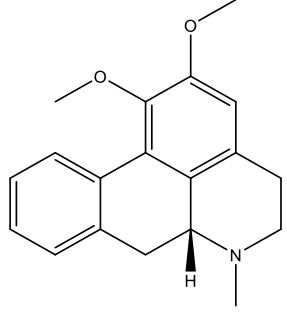  |
| 64 | N-Nornuciferine | 7.4%±0.042  | Must bio-technology | 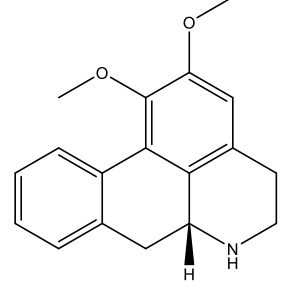 |

|    |                                               |             |                     |                                                                                       |
|----|-----------------------------------------------|-------------|---------------------|---------------------------------------------------------------------------------------|
| 65 | Cyasterone                                    | 6.3%±0.035  | Must bio-technology | 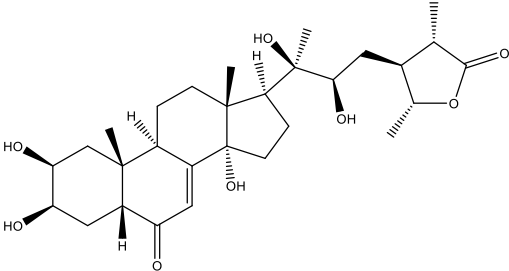    |
| 66 | Stevioside                                    | 7.4%±0.014  | Must bio-technology | 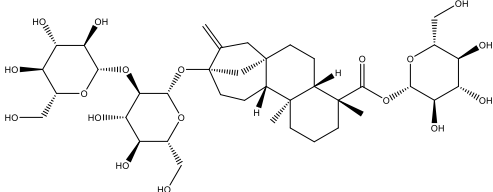    |
| 67 | Epicatechin                                   | 28.1%±0.027 | Must bio-technology | 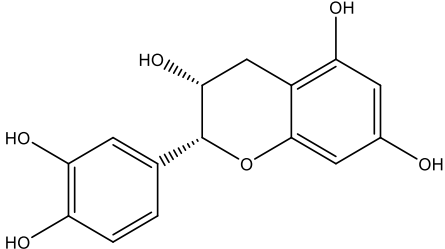   |
| 68 | 2-deoxy-2,3-didehydro-N-acetylneuraminic acid | 53.3%±0.017 | TCI                 | 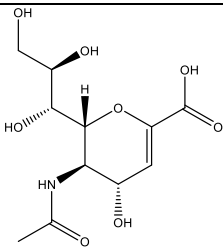 |

12 **Table S3** Nucleotide sequences of gene-specific primers used for quantitative real-time  
 13 reverse transcription PCR.

| Gene name           | Primer   | Sequence of primers (5' to 3') |
|---------------------|----------|--------------------------------|
| Human $\alpha$ -SMA | Forward  | GCTGCCCAGAGACCCTGTT            |
|                     | Reversed | TTTCATGGATGCCAGCAGACT          |
| Human VIMENTIN      | Forward  | CAGAGAGAG GAAGCCGAAAG          |
|                     | Reversed | ATGCTGTTCCTGAATCTGGG           |
| Human N-CADHERIN    | Forward  | AAGAGAGACTGGGTCATCC            |
|                     | Reversed | TGAGATGGGGTTGATAATG            |
| Human E-CADHERIN    | Forward  | TAACAGGAACACAGGAGTCATCA        |
|                     | Reversed | GTGGTGGGATTGAAGATCGG           |
| Human FNI           | Forward  | CCACAGTGGAGTATGTGGTTAG         |
|                     | Reversed | CAGTCCTTTAGGGCGATCAAT          |
| Human COL1A1        | Forward  | TGTGCCACTCTGACTGGAAG           |
|                     | Reversed | CGCCATACTCGAACTGGAATC          |
| Human COL3A1        | Forward  | CGCCCTCCTAATGGTCAAGG           |
|                     | Reversed | TTCTGAGGACCAGTAGGGCA           |
| Human COL4A1        | Forward  | TGTTGACGGCTTACCTGGAGAC         |
|                     | Reversed | GGTAGACCAACTCCAGGCTCTC         |
| Human CCL2          | Forward  | CAGGTCCCTGTGTCATGCTTCT         |
|                     | Reversed | GTCAGCACAGACCTCTCTCT           |
| Human PAI1          | Forward  | GCACCACAGACGCGATCTT            |
|                     | Reversed | ACCTCTGAAAAGTCCACTTGC          |
| Human TGF- $\beta$  | Forward  | CTAATGGTGGAAACCCACAACG         |
|                     | Reversed | TATCGCCAGGAATTGTTGCTG          |
| Human ARG1          | Forward  | TCAGAGCATGAGCGCCAAGT           |
|                     | Reversed | CCTCGTGGCTGTCCCTTTGA           |
| Human NEU4          | Forward  | GGCCACGGGATGACAGTTG            |
|                     | Reversed | CAGGCGGATACCCATGTGTAG          |
| Human SNAIL         | Forward  | TCGGAAGCCTAACTACAGCG           |
|                     | Reversed | CAGATGAGCATTGGCAGCGA           |
| Human KIM-1         | Forward  | CCCACGTCACCTATCGGAAG           |

|                                     |          |                          |
|-------------------------------------|----------|--------------------------|
|                                     | Reversed | GTGCTCAACACGGCAACAAT     |
| Human <i>TNF<math>\alpha</math></i> | Forward  | CCTCTCTCTAATCAGCCCTCTG   |
|                                     | Reversed | GAGGACCTGGGAGTAGATGAG    |
| Human <i>IL6</i>                    | Forward  | ACTCACCTCTTCAGAACGAATTG  |
|                                     | Reversed | CCATCTTTGGAAGGTTTCAGGTTG |
| Human <i>IL1<math>\beta</math></i>  | Forward  | AGCTACGAATCTCCGACCAC     |
|                                     | Reversed | CGTTATCCCATGTGTCTGAAGAA  |
| Human <i>IL10</i>                   | Forward  | ACCTGCCTAACATGCTTCGAG    |
|                                     | Reversed | GGCATCACCTCCTCCAGGTA     |
| Human <i>P21</i>                    | Forward  | TCTTGTACCCTTGTGCCTCG     |
|                                     | Reversed | ATCTGTCATGCTGGTCTGCC     |
| Human <i>P16</i>                    | Forward  | TGAAGCTCCCAGAATGCCAG     |
|                                     | Reversed | GCTGCCCTGGTAGGTTTTCT     |
| Human <i>P53</i>                    | Forward  | ACTTCAGGGGTGCCACATTC     |
|                                     | Reversed | CGACCCTGTCCCTCACCTCC     |
| Human <i>IL8</i>                    | Forward  | ACTCCAAACCTTTCCACCCC     |
|                                     | Reversed | CCTCTGCACCCAGTTTTCT      |
| Human <i>KI67</i>                   | Forward  | GGAAGCTGGACGCAGAAGAT     |
|                                     | Reversed | CAGCACCATTTGCCAGTTCC     |
| Human $\gamma$ <i>H2AX</i>          | Forward  | AGAAGACGCGAATCATCCCC     |
|                                     | Reversed | TGGTCTTCTTGGGCAGCAG      |
| Human <i>GAPDH</i>                  | Forward  | GGAGCGAGATCCCTCCAAAAT    |
|                                     | Reversed | GGCTGTTGTCATACTTCTCATGG  |
| Human $\beta$ - <i>actin</i>        | Forward  | GATCATTGCTCCTCCTGAGC     |
|                                     | Reversed | ACTCCTGCTTGCTGATCCAC     |
| Mouse $\alpha$ - <i>Sma</i>         | Forward  | GGACTTTGAAAATGAGATGG     |
|                                     | Reversed | TGATGCTGTTATAGGTGGTT     |
| Mouse <i>Vimentin</i>               | Forward  | CAGAGAGAG GAAGCCGAAAG    |
|                                     | Reversed | ATGCTGTTCTGAATCTGGG      |
| Mouse <i>N-cadherin</i>             | Forward  | AAGAGAGACTGGGTCATCC      |
|                                     | Reversed | TGAGATGGGGTTGATAATG      |
| Mouse <i>Fibronectin</i>            | Forward  | CCACAGTGGAGTATGTGGTTAG   |

|                                     |          |                         |
|-------------------------------------|----------|-------------------------|
|                                     | Reversed | CAGTCCTTTAGGGCGATCAAT   |
| Mouse <i>Kim-1</i>                  | Forward  | CTATGTTGGCATCTGCATCG    |
|                                     | Reversed | AAGGCAACCACGCTTAGAGA    |
| Mouse <i>Neu4</i>                   | Forward  | GAACAGCGACTTAGCCCTGATG  |
|                                     | Reversed | TAGACCTGTGCTCCTCCAGTAC  |
| Mouse <i>Snai1</i>                  | Forward  | CTCCAAACCCACTCGGATGT    |
|                                     | Reversed | AGCCAGACTCTTGGTGCTTG    |
| Mouse <i>Snai2</i>                  | Forward  | GCCTCCAAGAAGCCCAACTA    |
|                                     | Reversed | GCCGACGATGTCCATACAGT    |
| Mouse <i>E-cadherin</i>             | Forward  | TAACAGGAACACAGGAGTCATCA |
|                                     | Reversed | GTGGTGGGATTGAAGATCGG    |
| Mouse <i>Col1a1</i>                 | Forward  | TTGGAGAGAGCATGACCG      |
|                                     | Reversed | TACGCTGTTCTTGCACTG      |
| Mouse <i>Col3a1</i>                 | Forward  | GTCTGGTGGCTTTTCACCCT    |
|                                     | Reversed | AGTTCGGGGTGGCAGAATTT    |
| Mouse <i>Col4a1</i>                 | Forward  | AACAACGTCTGCAACTTCGC    |
|                                     | Reversed | CTTCACAAACCGCACACCTG    |
| Mouse <i>Ccl2</i>                   | Forward  | CAGGTCCCTGTCATGCTTCT    |
|                                     | Reversed | GTCAGCACAGACCTCTCTCT    |
| Mouse <i>Tgf-<math>\beta</math></i> | Forward  | GACCGCAACAACGCCATCTA    |
|                                     | Reversed | GGCGTATCAGTGGGGGTCAG    |
| Mouse <i>Mmp2</i>                   | Forward  | ACCTGAACACTTTCTATGGCTG  |
|                                     | Reversed | CTTCCGCATGGTCTCGATG     |
| Mouse <i>Mmp7</i>                   | Forward  | TAGGCGGAGATGCTCACTTT    |
|                                     | Reversed | TTCTGAATGCCTGCAATGTC    |
| Mouse <i>Mmp9</i>                   | Forward  | CTGGACAGCCAGACACTAAAG   |
|                                     | Reversed | CTCGCGGCAAGTCTTCAGAG    |
| Mouse <i>Mmp13</i>                  | Forward  | CTGGTCTTCTGGCACACGCT    |
|                                     | Reversed | GCAGCGCTCAGTCTCTTCAC    |
| Mouse <i>Fsp1</i>                   | Forward  | TGAGCAACTTGGACAGCAACA   |
|                                     | Reversed | TTCCGGGGTTCCTTATCTGGG   |
| Mouse <i>Timp1</i>                  | Forward  | GCAACTCGGACCTGGTCATAA   |

|                      |          |                          |
|----------------------|----------|--------------------------|
|                      | Reversed | CGGCCCCGTGATGAGAAACT     |
| Mouse <i>Tnfa</i>    | Forward  | TCTCATGCACCACCATCAAGGACT |
|                      | Reversed | ACCACTCTCCCTTTGCAGAATCA  |
| Mouse <i>Il6</i>     | Forward  | ATCCAGTTGCCTTCTTGGGACTGA |
|                      | Reversed | TAAGCCTCCGACTTGTGAAGTGGT |
| Mouse <i>Il1β</i>    | Forward  | GCAACTGTTCCTGAACTCAACT   |
|                      | Reversed | ATCTTTTGGGGTCCGTCAACT    |
| Mouse <i>Yap</i>     | Forward  | CCAGACGACTTCCTCAACAGTG   |
|                      | Reversed | GCATCTCCTTCCAGTGTGCCAA   |
| Mouse <i>Negr1</i>   | Forward  | GCCTTCGAGTGGTACAAAGGA    |
|                      | Reversed | CTGTACTTGGAGGGTTGAGGG    |
| Mouse <i>Ankrd1</i>  | Forward  | ATAAACGGACGGCACTCCAC     |
|                      | Reversed | CATCTGCGTTTCCCTCCACGA    |
| Mouse <i>Ctgf</i>    | Forward  | GCCTACCGACTGGAAGACAC     |
|                      | Reversed | GTAACTCGGGTGGAGATGCC     |
| Mouse <i>Cyr61</i>   | Forward  | ATGACCTCCTCGGACTCGAT     |
|                      | Reversed | GGGTTGAAAAGAAGTTCGCGG    |
| Mouse <i>P21</i>     | Forward  | TTGTCGCTGTCTTGCACCTCT    |
|                      | Reversed | TTTCGGCCCTGAGATGTTCC     |
| Mouse <i>P16</i>     | Forward  | GAACTCTTTCGGTTCGTACCCC   |
|                      | Reversed | TAGTGGGGTCCTCGCAGTT      |
| Mouse <i>P53</i>     | Forward  | TGGAGGAGTCACAGTCGGAT     |
|                      | Reversed | CGTCCATGCAGTGAGGTGAT     |
| Mouse <i>Il8</i>     | Forward  | TGGGTGAAGGCTACTGTTGG     |
|                      | Reversed | AGCTTCATTGCCGGTGGAAA     |
| Mouse <i>GAPDH</i>   | Forward  | TGTGTCCGTCGTGGATCTGA     |
|                      | Reversed | CCTGCTTCACCACCTTCTTGAT   |
| Mouse <i>β-actin</i> | Forward  | GCTCTGGCTCCTAGCACC       |
|                      | Reversed | CCACTATCCACACAGAGTACTTG  |

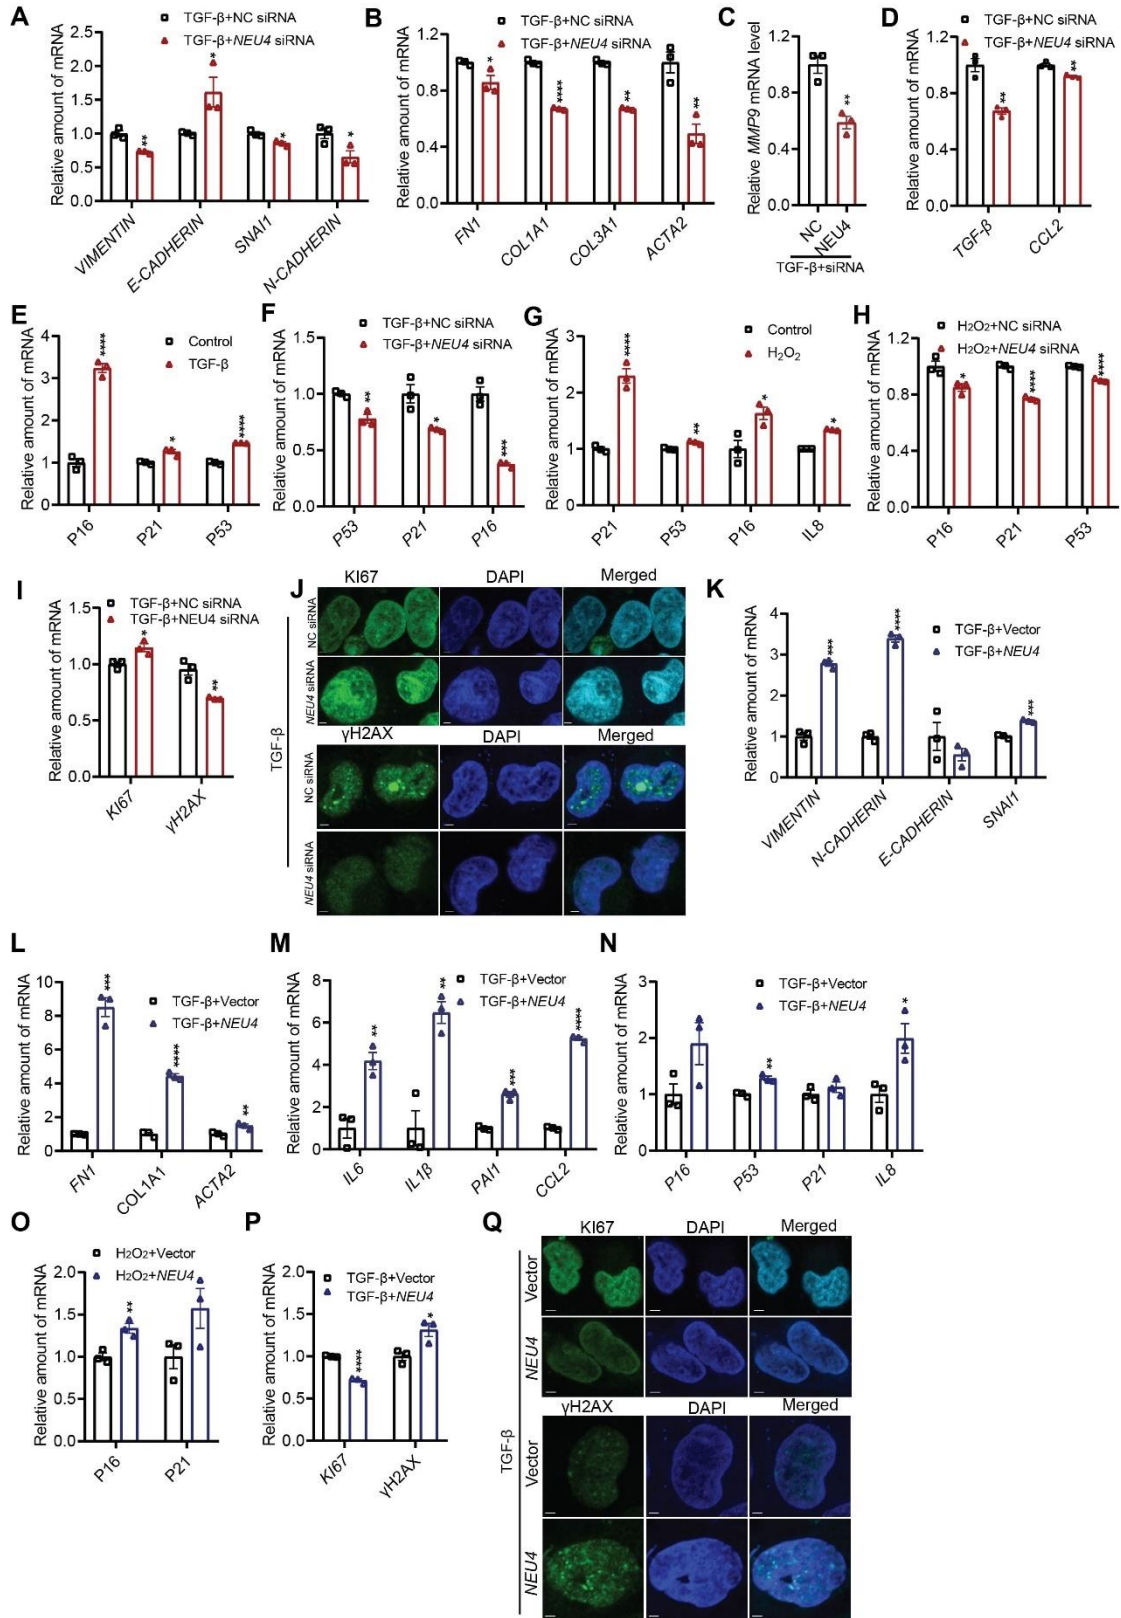

**Figure S1. NEU4 promoted epithelial-mesenchymal transition (EMT) and cellular senescence in TGF-β-induced HK-2 cells. (A-F, I) Relative EMT associated gene (A), ECM associated gene (B), *MMP9* (C), chemokine associated (D), senescence-**

19 associated gene (**E, F**) and DNA damage marker gene (**I**) mRNA level in HK-2 cells.  $n$   
 20 = 3 samples. (**G, H**) Relative senescence-associated gene mRNA level in HK-2 cells.  $n$   
 21 = 3 samples. (**J, Q**) Immunofluorescent staining represents KI67 or  $\gamma$ H2AX in HK-2  
 22 cells. Scale bar, 10  $\mu$ m,  $n$  = 3 samples. (**K-P**) Relative EMT associated gene (**K**), ECM  
 23 associated gene (**L**), inflammation associated gene (**M**), senescence-associated gene (**N**,  
 24 **O**) and DNA damage marker gene (**P**) mRNA level in HK-2 cell.  $n$  = 3 samples. (**A-D**,  
 25 **F, I, J**) HK-2 cells treatment with TGF- $\beta$  24 h after transfection with *NEU4* siRNA. (**E**,  
 26 **G**) HK-2 cells treatment with TGF- $\beta$  24 h or H<sub>2</sub>O<sub>2</sub> 6 h. (**K-Q**) HK-2 cells treatment  
 27 with TGF- $\beta$  24 h after transfection with *NEU4*-overexpression plasmids. (**H, O**) HK-2  
 28 cells treatment with H<sub>2</sub>O<sub>2</sub> 6 h after transfection with *NEU4* siRNA (**H**) or *NEU4*-  
 29 overexpression plasmids (**O**). Data are presented as mean  $\pm$  SEM. Comparisons  
 30 between two groups were analyzed by using a two-tailed Student's  $t$  test.  $*p<0.05$ ,  
 31  $**p<0.01$ ,  $***p<0.001$ ,  $****p<0.0001$  versus the NC siRNA or Vector group.

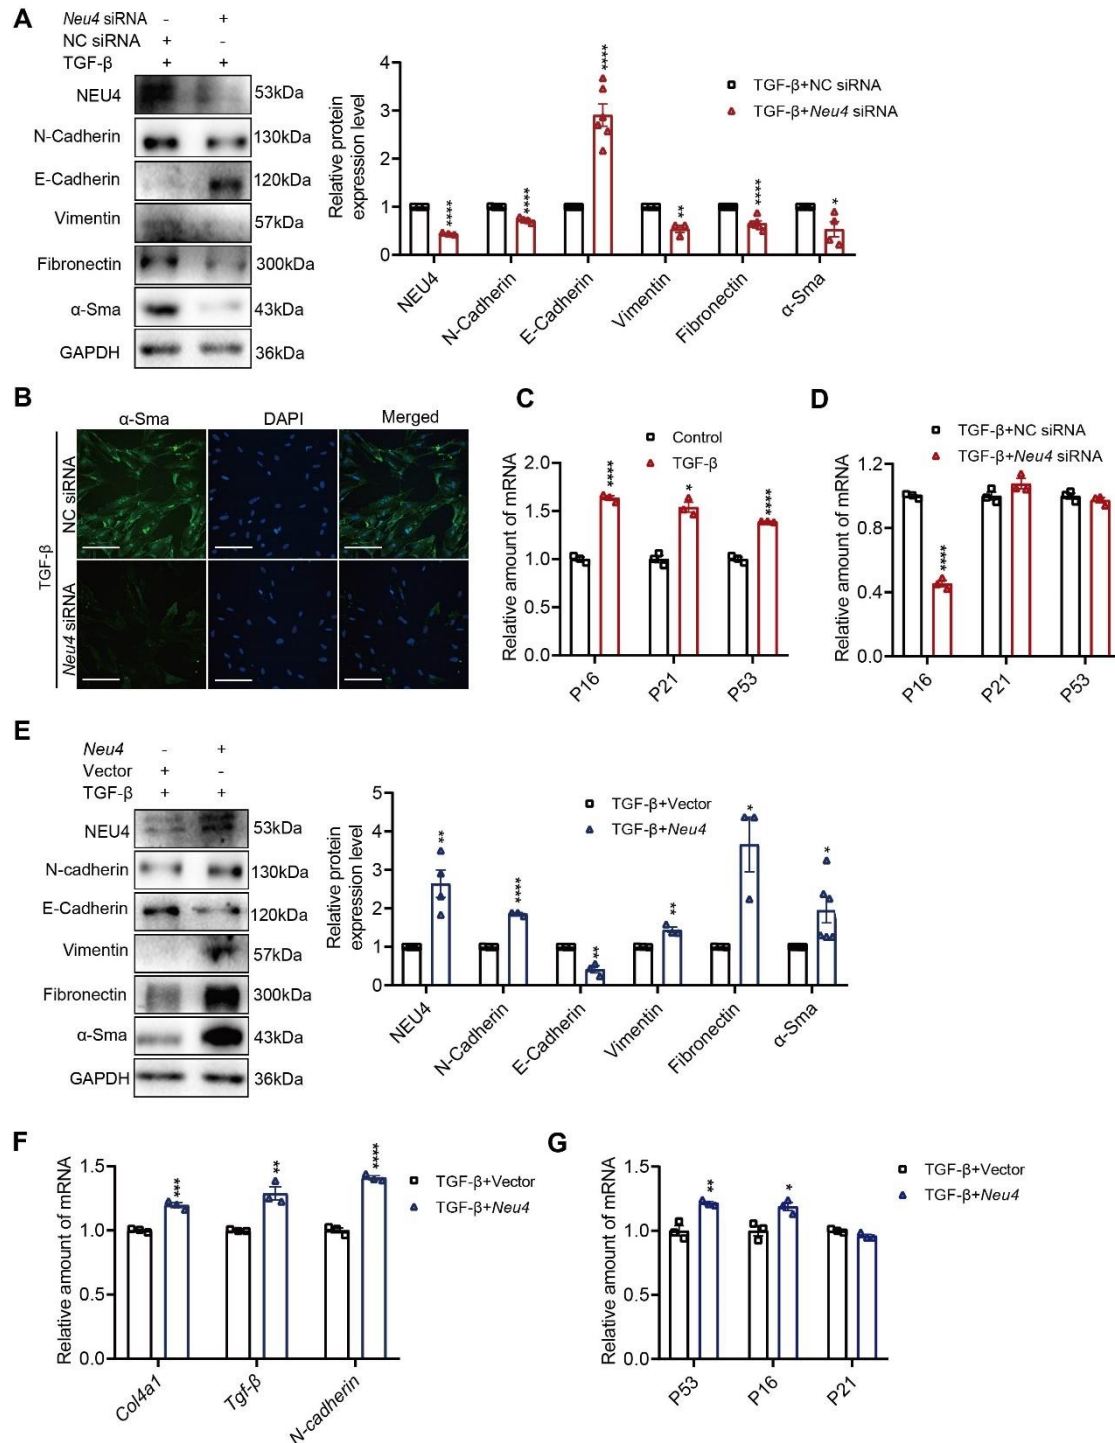

**Figure S2. NEU4 promoted EMT and cell senescence in TGF- $\beta$ -induced PTECs.**

(A) Western blot (left panel) and quantification (right panel) of the protein expression of NEU4, N-Cadherin, E-Cadherin, Vimentin, Fibronectin and  $\alpha$ -Sma in PTECs. GAPDH served as loading control,  $n = 3-6$  samples. (B) Immunofluorescent staining represents  $\alpha$ -Sma in PTECs. Scale bar, 100  $\mu$ m,  $n = 3$  samples. (C, D) Relative senescence associated gene mRNA level in PTECs,  $n = 3$  samples. (E) Western blot

39 (left panel) and quantification (right panel) of the protein expression of NEU4, N-  
40 Cadherin, E-Cadherin, Vimentin, Fibronectin and  $\alpha$ -Sma in PTECs. GAPDH served as  
41 loading control,  $n = 3$ -6 samples. **(F, G)** Relative EMT associated gene, ECM associated  
42 gene **(F)** and senescence associated gene **(G)** mRNA level in PTECs,  $n = 3$  samples. **(C)**  
43 PTECs treatment with TGF- $\beta$  24 h. **(A-B, D)** PTECs treatment with TGF- $\beta$  24 h after  
44 transfection with *Neu4* siRNA. **(E-G)** PTECs treatment with TGF- $\beta$  24 h after  
45 transfection with *Neu4*-overexpression plasmids. Error bars represent mean  $\pm$  SEM.  
46 Comparisons between two groups were analyzed by using a two-tailed Student's *t* test.  
47 \* $p < 0.05$ , \*\* $p < 0.01$ , \*\*\* $p < 0.001$ , \*\*\*\* $p < 0.0001$  versus the NC siRNA or Vector group.  
48

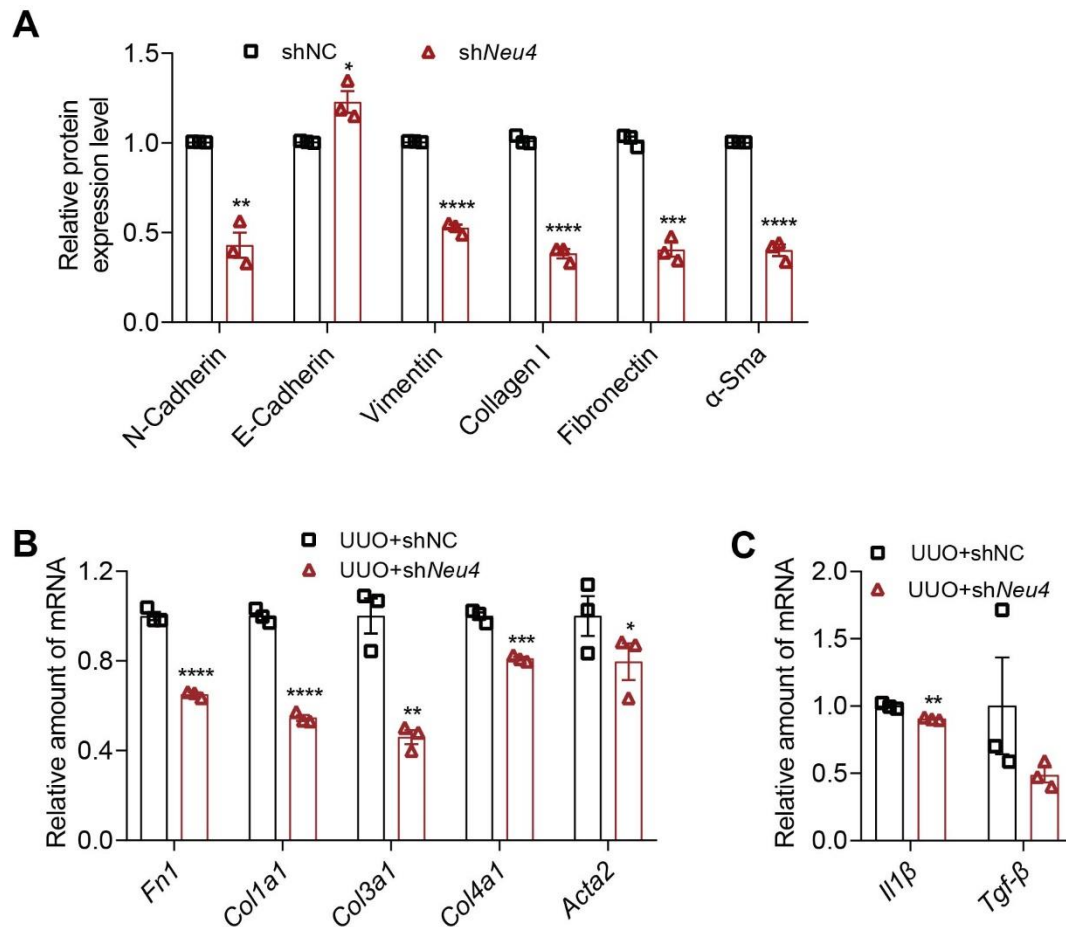

**Figure S3. *Neu4* knockdown alleviated UUO-induced EMT, ECM and inflammation in mice.** (A) Quantification of the expression of N-Cadherin, E-Cadherin, Vimentin, Collagen I, Fibronectin and  $\alpha$ -Sma as shown in Figure 3E. GAPDH served as loading control.  $n = 3-5$  mice. (B, C) Relative mRNA level of ECM associated genes (B) and inflammation associated genes (C) were determined by RT-qPCR,  $n = 3$  mice. Error bars represent mean  $\pm$  SEM. Comparisons between two groups were analyzed by using a two-tailed Student's  $t$  test. \* $p < 0.05$ , \*\*\*\* $p < 0.0001$  versus the shNC.

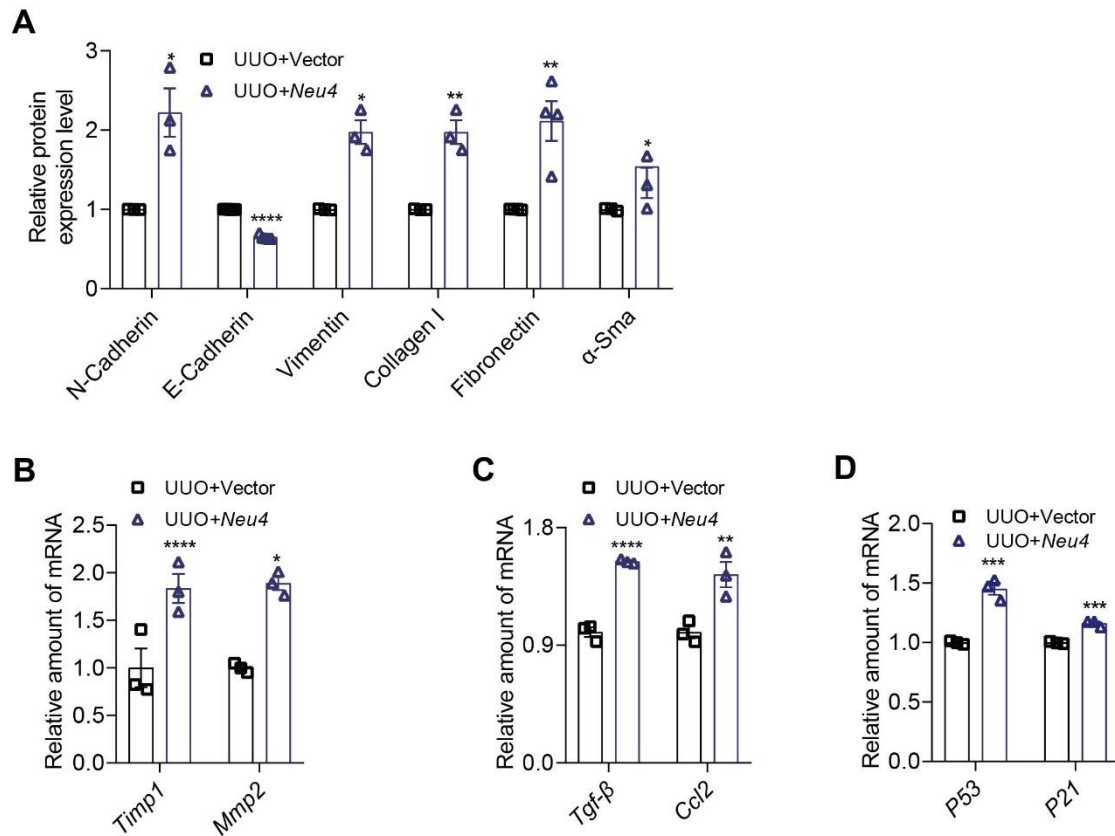

**Figure S4. *Neu4* overexpression aggravated UUO-induced EMT and cellular senescence in mice.** (A) Quantification of the protein expression of α-Sma, N-Cadherin, E-Cadherin, Vimentin, Fibronectin and Collagen I in kidneys as shown in Figure 4E. GAPDH served as loading control,  $n = 3-5$  mice. (B-D) Relative extracellular matrix associated gene (B), chemokine associated (C) and senescence associated gene (D) mRNA level in left kidney.  $n = 3$  mice. Error bars represent mean  $\pm$  SEM. Comparisons between two groups were analyzed by using a two-tailed Student's  $t$  test. \* $p < 0.05$ , \*\* $p < 0.01$ , \*\*\* $p < 0.001$ , \*\*\*\* $p < 0.0001$  versus the Vector group.

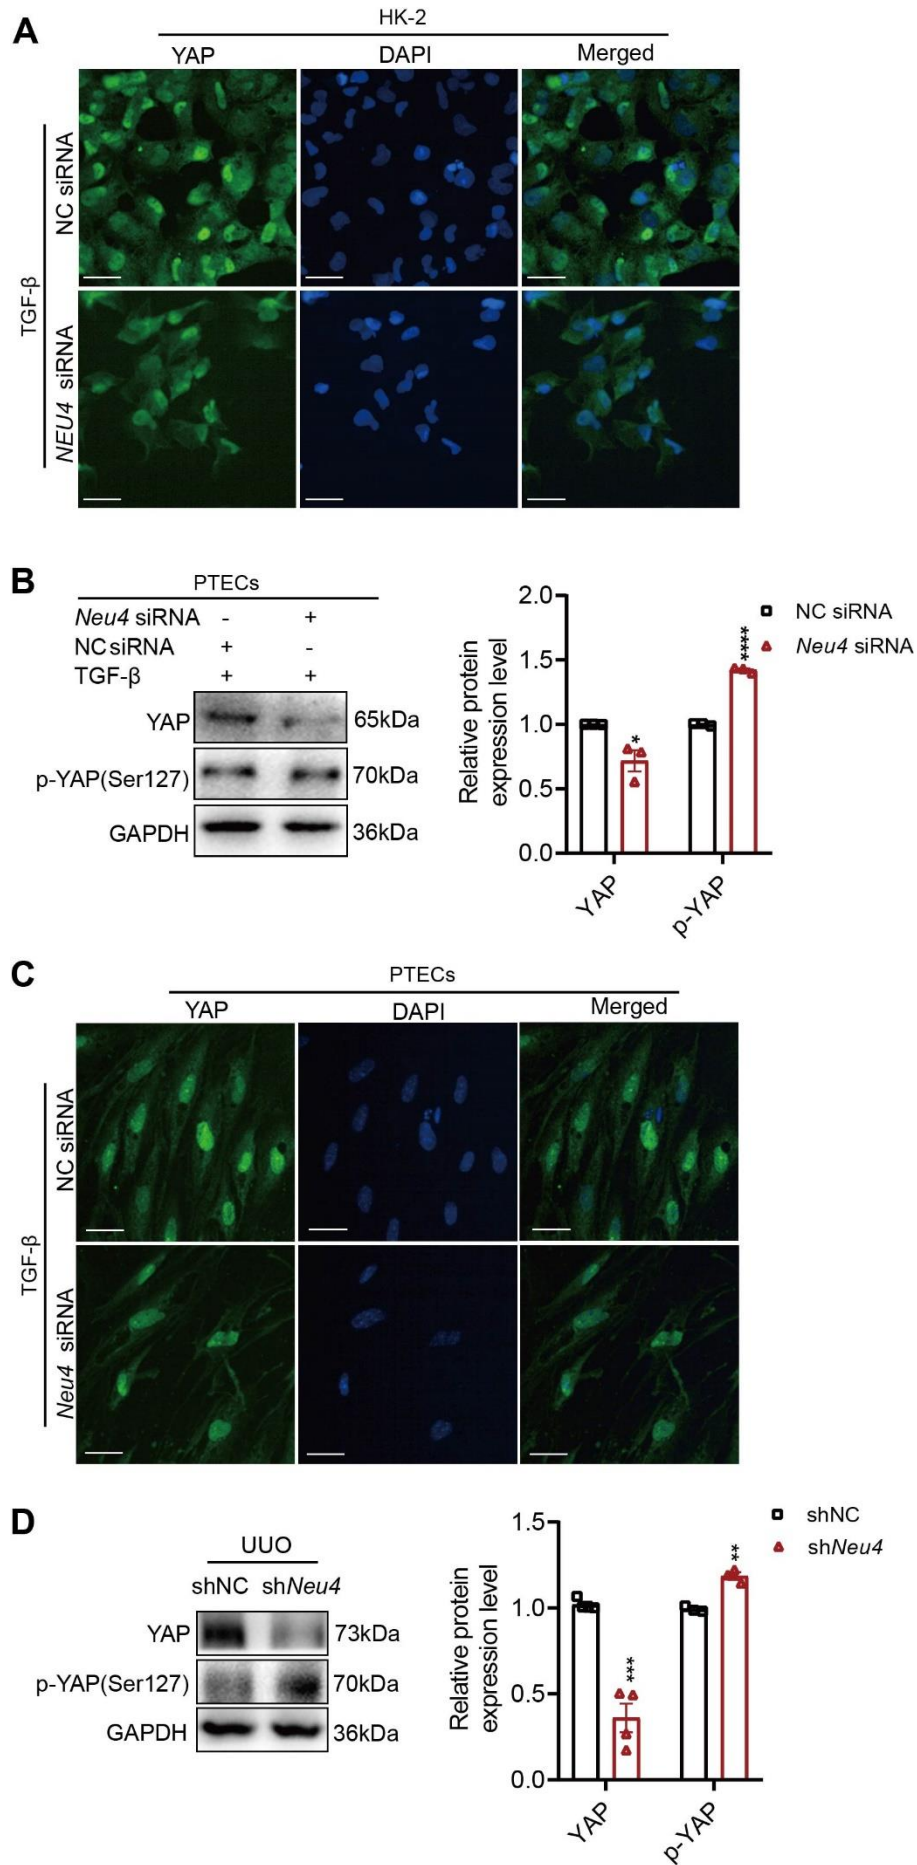

**Figure S5. NEU4 knockdown inhibits activation of Yes-associated protein (YAP).**  
**Related to Figure 6.** (A) Immunofluorescent staining represents YAP in HK-2 cells treatment with TGF- $\beta$  24 h after transfection with *Neu4* siRNA. Scale bar, 100  $\mu$ m,  $n$  = 3 samples. (B) Western blot (left panel) and quantification (right panel) of the protein expression of YAP and phosphorylation of YAP in PTECs. GAPDH served as loading control,  $n$  = 3 samples. (C) Immunofluorescent staining represents YAP in PTECs. Scale bar, 100  $\mu$ m,  $n$  = 3 samples. (D) Western blot (left panel) and quantification (right panel) of the protein expression of YAP and phosphorylation of YAP in left kidneys from UUO mice with sh*Neu4*. GAPDH served as loading control,  $n$  = 3-4 mice. (B and C) PTECs treatment with TGF- $\beta$  24 h after transfection with *Neu4* siRNA. Error bars represent mean  $\pm$  SEM. Comparisons between two groups were analyzed by using a two-tailed Student's  $t$  test. \* $p$ <0.05, \*\* $p$ <0.01, \*\*\* $p$ <0.001, \*\*\*\* $p$ <0.0001 versus the NC siRNA or shNC group.

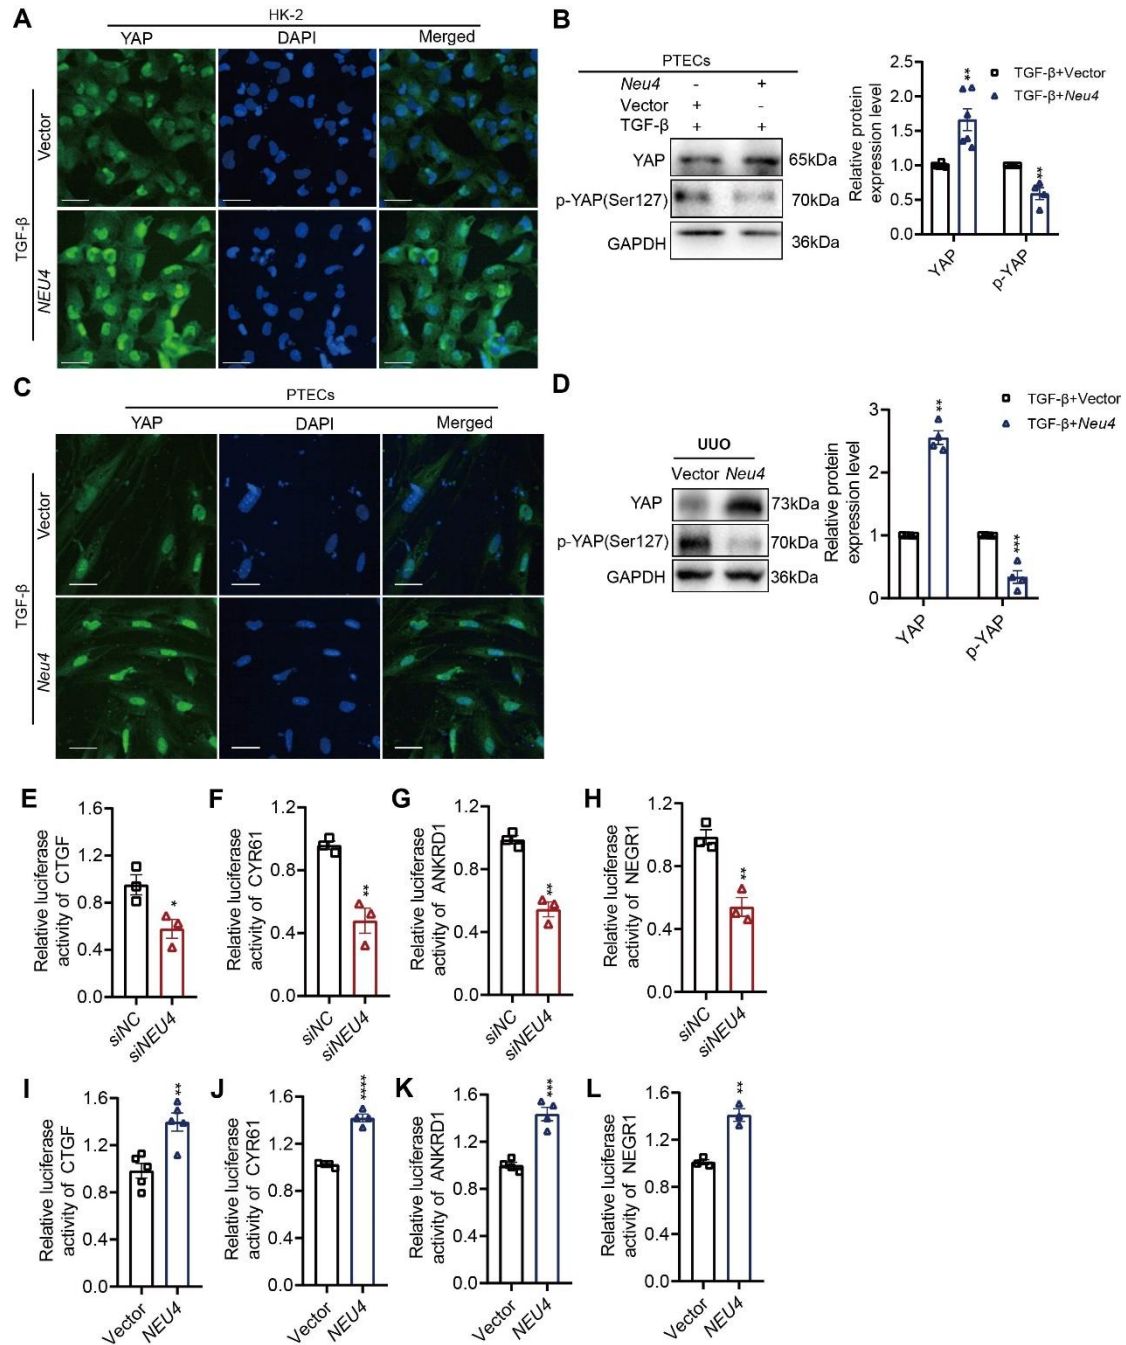

**Figure S6. NEU4 overexpression promotes activation of YAP.** (A) Immunofluorescent staining represents YAP in HK-2 cells treatment with TGF- $\beta$  24 h after transfection with *NEU4*-overexpression plasmids. Scale bar, 100  $\mu$ m,  $n = 3$  samples. (B) Western blot (left panel) and quantification (right panel) of YAP and phosphorylation of YAP in PTECs, GAPDH served as loading control,  $n = 4-6$  samples. (C) Immunofluorescent staining represents YAP in PTECs. Scale bar, 100  $\mu$ m,  $n = 3$  samples. (D) Western blot (left panel) and quantification (right panel) of the protein

91 expression of YAP and phosphorylation of YAP in left kidneys from UUO mice with  
92 *Neu4*-overexpression plasmids. GAPDH served as loading control,  $n = 4$  mice. (**B** and  
93 **D**) PTECs treatment with TGF- $\beta$  24 h after transfection with *Neu4*-overexpression  
94 plasmids. (**E-L**) 293T cells were co-transfected with *YAP* and *Luc-CTGF* or *Luc-CYR61*  
95 or *Luc-ANKRD1* or *Luc-NEGR1* and si*NEU4* (E-H) or *NEU4* plasmid (I-L) for 48 h.  
96 Luciferase activity was determined using the luciferase reporter system.  $n = 3-5$  samples.  
97 Error bars represent mean  $\pm$  SEM. Comparisons between two groups were analyzed by  
98 using a two-tailed Student's  $t$  test.  $*p < 0.05$ ,  $**p < 0.01$ ,  $***p < 0.001$ ,  $****p < 0.0001$   
99 versus the Vector group.

**A**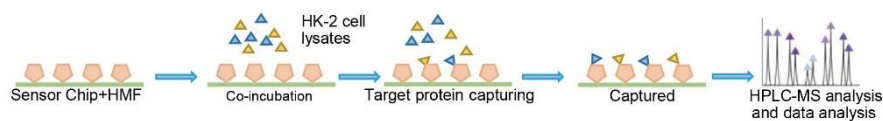**B**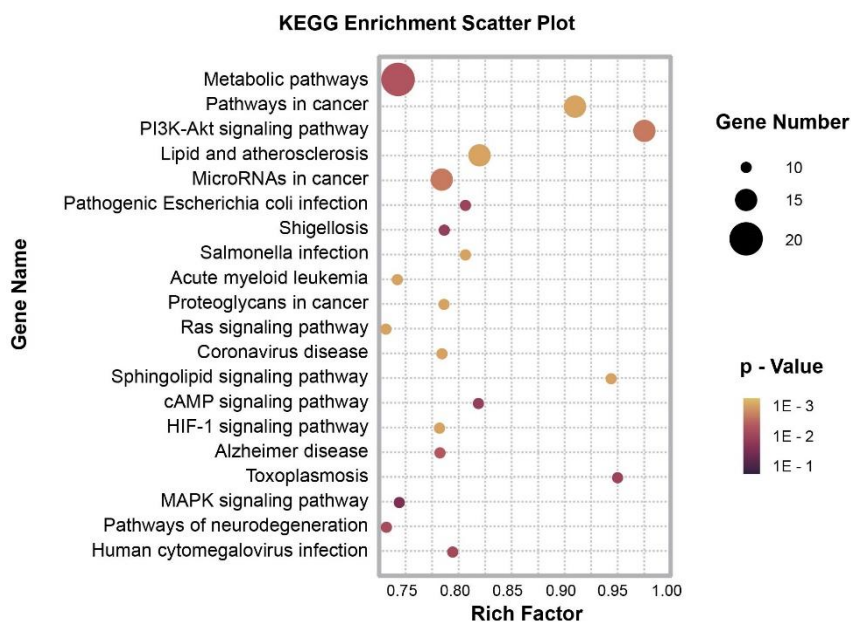

**Figure S7. NEU4 served as a cellular target of anti-fibrosis small-molecule HMF.**  
**(A)** Schematic representation of the HMF molecular capture protocol. **(B)** Genomes (KEGG) pathway analysis of the identified changed proteins in HK-2 cells 24 h after treatment with TGF- $\beta$ .

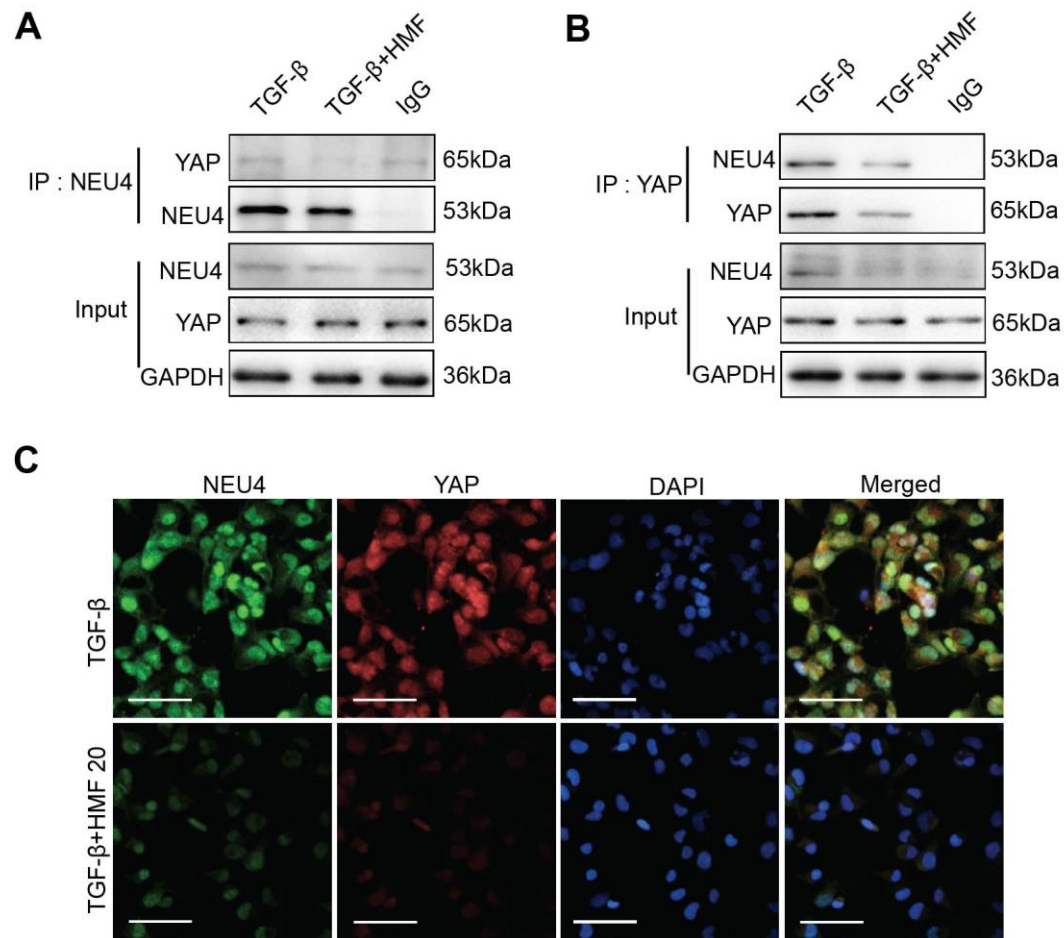

**Figure S8. HMF inhibited the interaction between NEU4 and YAP. (A and B)**

Western blotting of CoIP of NEU4 and YAP in HK-2 cells treated with TGF- $\beta$  and in the presence of DMSO or HMF. (C) Colocalization of NEU4 and YAP was analyzed by immunofluorescence in HK-2 cells stimulated with TGF- $\beta$  and in the presence of DMSO or HMF 24 h. Scale bar, 100  $\mu$ m,  $n = 3$  samples.

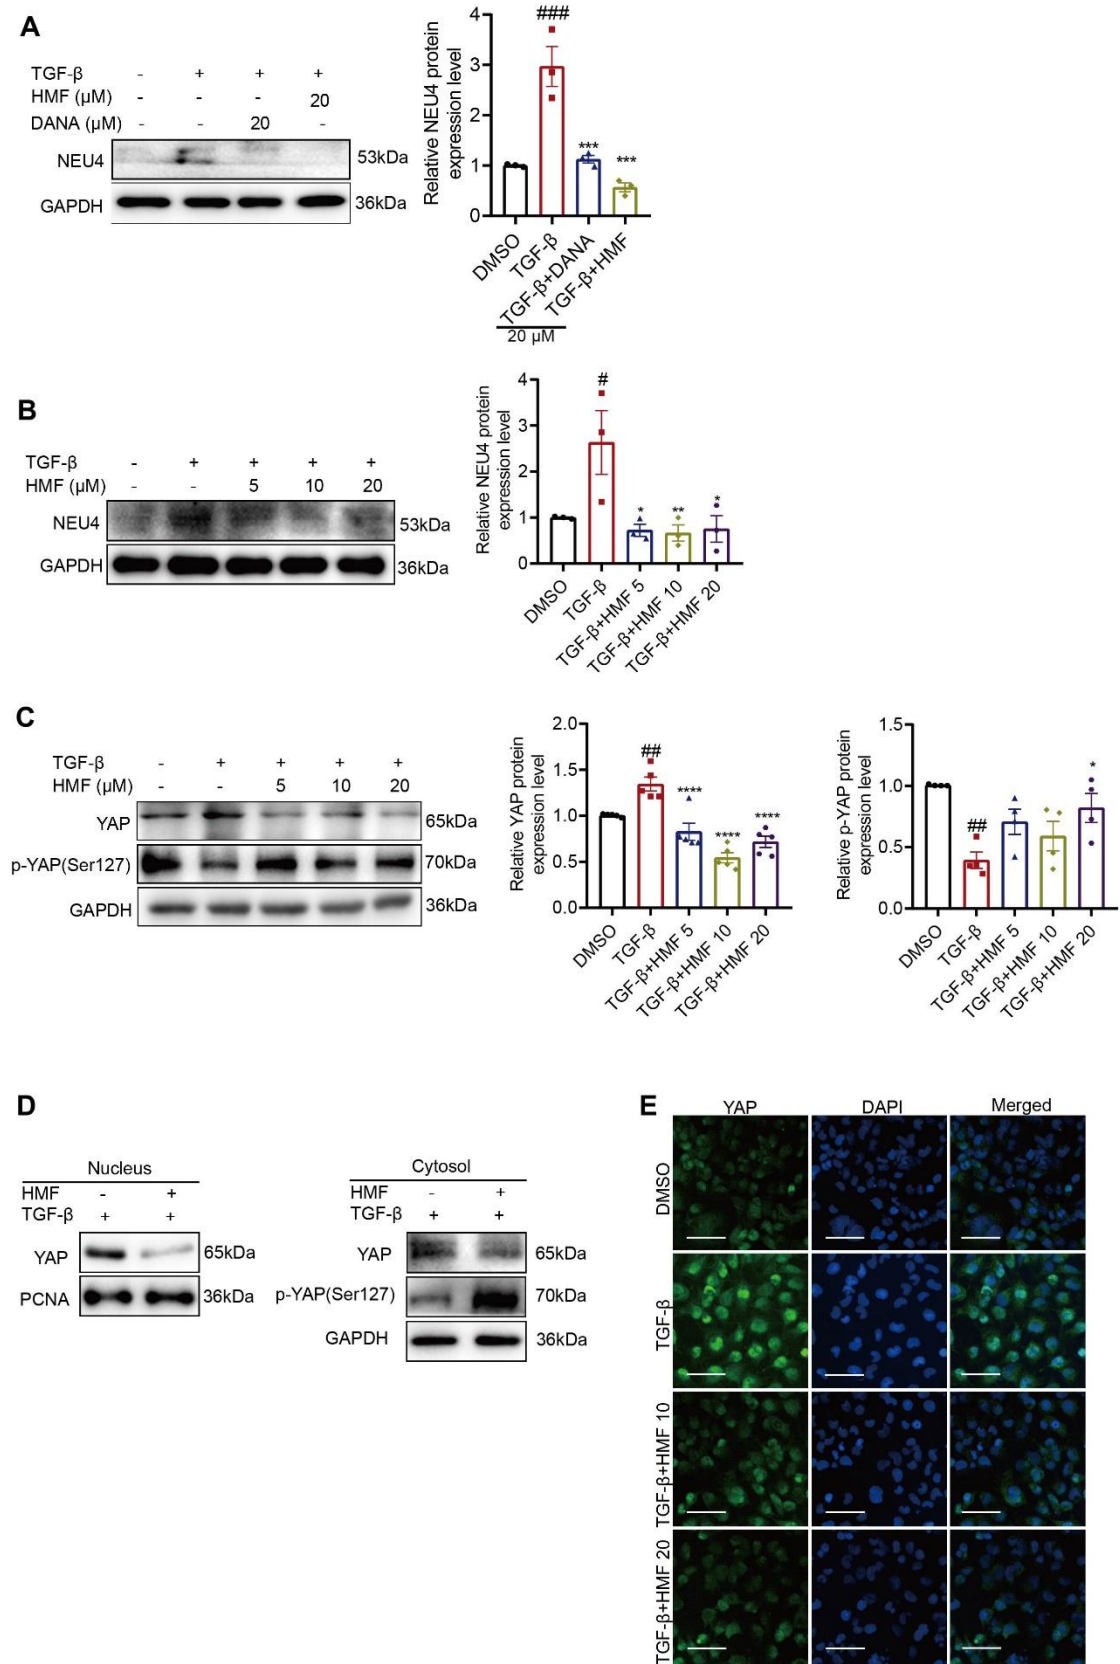

**Figure S9. HMF inhibited NEU4 and YAP expression.** (A) Western blot (left panel) and quantification (right panel) of the protein expression of NEU4 in HK-2 cells 24 h

after treatment with TGF- $\beta$  and in the presence of DANA or HMF. GAPDH served as loading control,  $n = 3$  samples. **(B and C)** Western blot (left panel) and quantification (right panel) of the protein expression of NEU4 **(B)**, YAP and phosphorylation of YAP **(C)** in HK-2 cells 24 h after treatment with TGF- $\beta$  and in the presence of DMSO or HMF. GAPDH served as loading control,  $n = 3-5$  samples. **(D)** Western blot of the protein expression of YAP in nuclear and cytosol, phosphorylation of YAP in cytosol in HK-2 cells 24 h after treatment with TGF- $\beta$  and in the presence of DMSO or HMF. **(E)** Immunofluorescent staining represents YAP expressions in HK-2 cells treatment with TGF- $\beta$  and in the presence of DMSO or HMF 24 h. Scale bar, 100  $\mu\text{m}$ ,  $n = 3$  samples. Error bars represent mean  $\pm$  SEM. Comparisons those among three or more groups by using one-way analysis of variance (ANOVA) followed by Dunnett's post hoc tests.  $*p < 0.05$ ,  $**p < 0.01$ ,  $***p < 0.001$ ,  $****p < 0.0001$  versus the TGF- $\beta$  group,  $^{\#}p < 0.05$ ,  $^{\#\#}p < 0.01$ ,  $^{\#\#\#}p < 0.001$  versus the DMSO group.

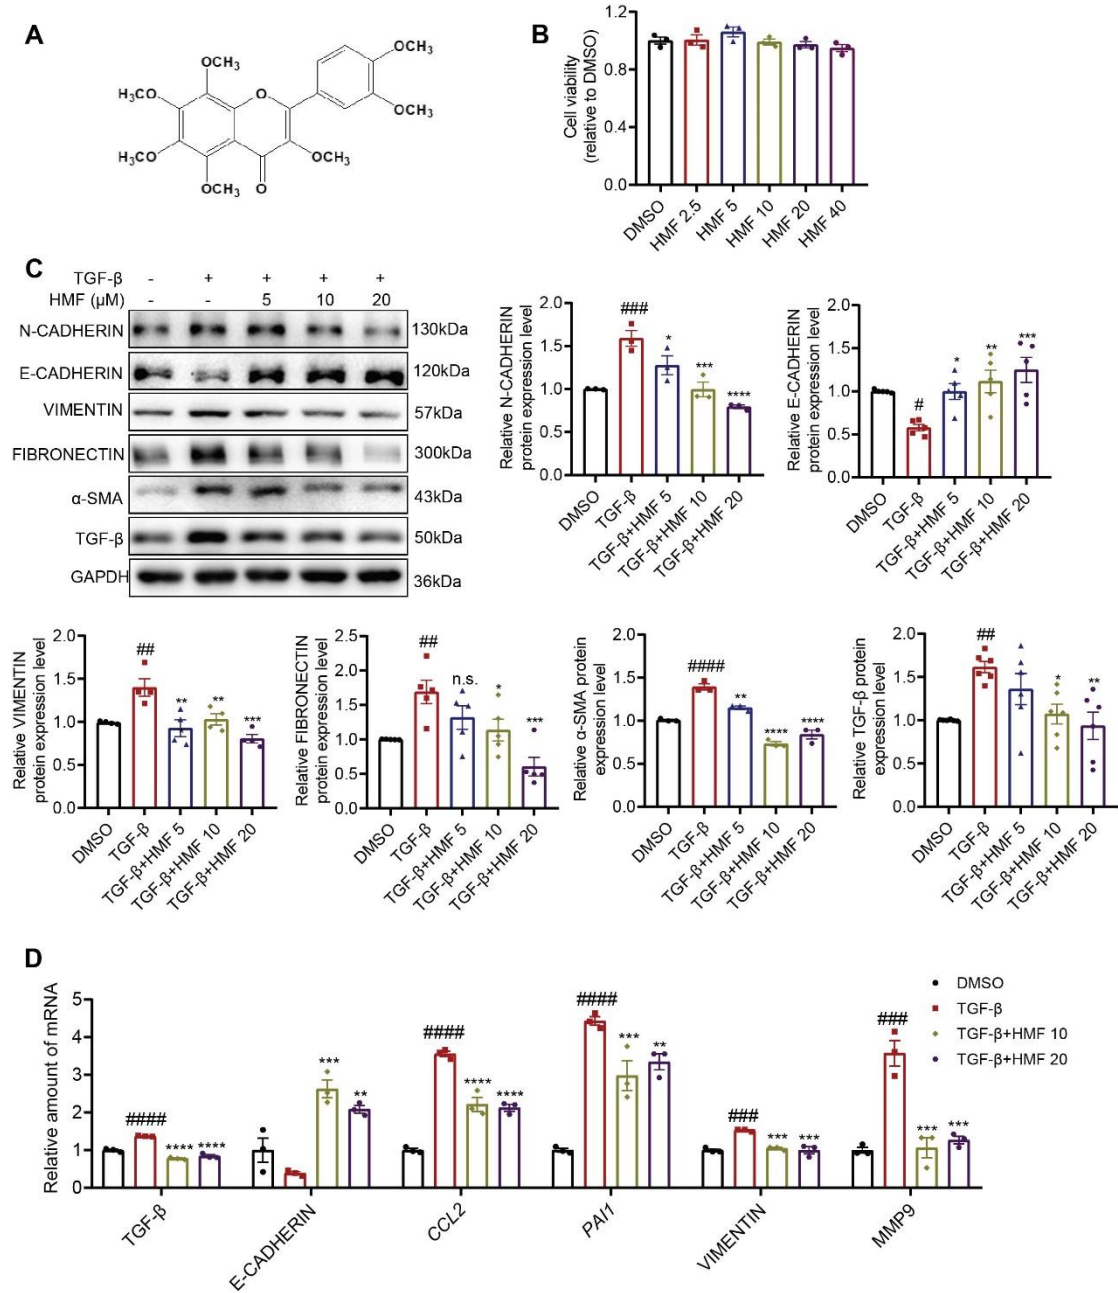

**Figure S10. HMF inhibited TGF- $\beta$ -induced EMT, and the production of proinflammatory cytokines in HK-2.** (A) The structure of HMF. (B) Cell viability after treatment with increasing concentrations of HMF in HK-2 cells for 24 h.  $n = 3$  biologically independent samples. (C) Western blot (left panel) and quantification (right panel) of the protein expression of N-CADHERIN, E-CADHERIN, VIMENTIN, FIBRONECTIN,  $\alpha$ -SMA and TGF- $\beta$  in HK-2 cells. GAPDH served as loading control.  $n = 3-6$  biologically independent samples. (D) Relative EMT associated gene and extracellular matrix associated gene mRNA level in HK-2 cells.  $n = 3$  biologically

137 independent samples. (C and D) HK-2 cells treated with TGF- $\beta$  and in the presence of  
138 DMSO or HMF for 24 h. Error bars represent mean  $\pm$  SEM. Comparisons those among  
139 three or more groups by using one-way analysis of variance (ANOVA) followed by  
140 Dunnett's post hoc tests. \* $p$ <0.05, \*\* $p$ <0.01, \*\*\* $p$ <0.001, \*\*\*\* $p$ <0.0001 versus the  
141 TGF- $\beta$  group, # $p$ <0.05, ## $p$ <0.001, ### $p$ <0.001, #### $p$ <0.0001 versus the DMSO group.

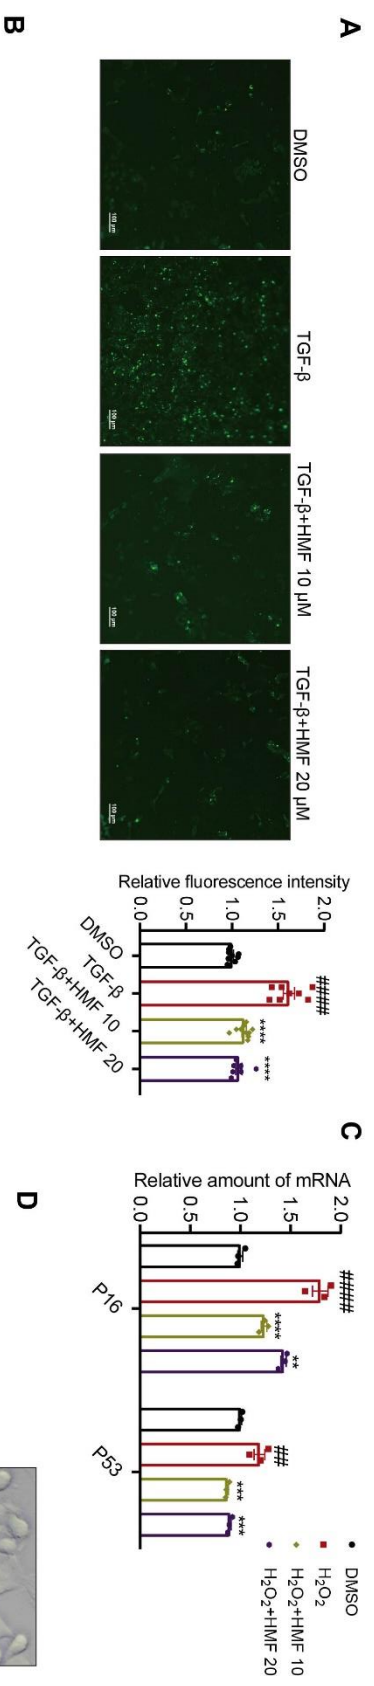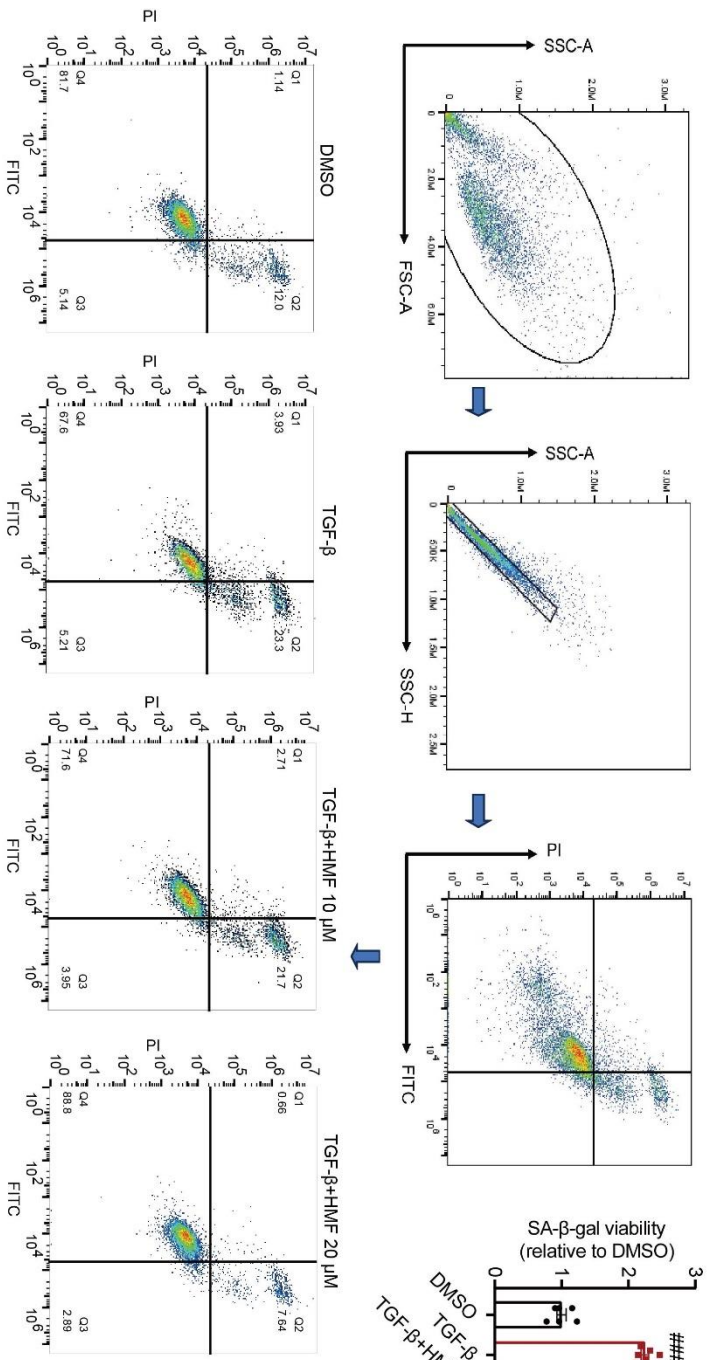

**Figure S11. HMF ameliorated TGF- $\beta$ -induced apoptosis and cellular senescence in HK-2.** (A) Measurement (left panel) and the quantification (right panel) of apoptosis by TUNEL staining in HK-2 cells. Scale bar, 100  $\mu$ m.  $n = 10$  samples. (B) Measurement of apoptosis by flow cytometric analysis in HK-2 cells. (C) Relative senescence associated gene mRNA level in HK-2 cells after treatment with H<sub>2</sub>O<sub>2</sub> in the presence of DMSO or HMF,  $n = 3$  biologically independent samples. (D) Measurement (right panel) and the quantification (left panel) of SA- $\beta$ -gal activity by SA- $\beta$ -gal staining in HK-2 cells. Scale bar, 100  $\mu$ m.  $n = 6$  samples. (A, B and D) HK-2 cells treated with TGF- $\beta$  and in the presence of DMSO or HMF for 24 h. Error bars represent mean  $\pm$  SEM. Comparisons those among three or more groups by using one-way analysis of variance (ANOVA) followed by Dunnett's post hoc tests. \*\* $p < 0.01$ , \*\*\* $p < 0.001$ , \*\*\*\* $p < 0.0001$  versus the TGF- $\beta$  or H<sub>2</sub>O<sub>2</sub> group, ## $p < 0.01$ , ##### $p < 0.0001$  versus the DMSO group.

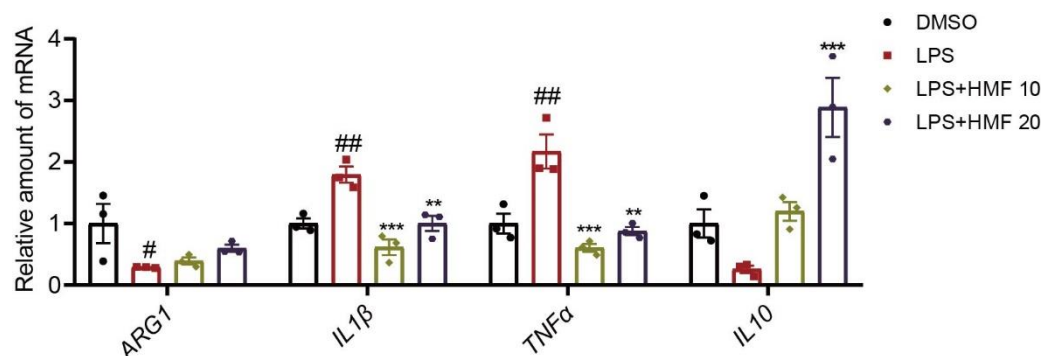

**Figure S12. HMF inhibited LPS-induced inflammation in HK-2.** Relative inflammation associated gene mRNA level in HK-2 cells 24 h after treatment with LPS in the presence of DMSO or HMF,  $n = 3$  biologically independent samples. Error bars represent mean  $\pm$  SEM. Comparisons those among three or more groups by using one-way analysis of variance (ANOVA) followed by Dunnett's post hoc tests.  $**p < 0.01$ ,  $***p < 0.001$  versus the LPS group,  $^{\#}p < 0.05$ ,  $^{##}p < 0.01$  versus the DMSO group.

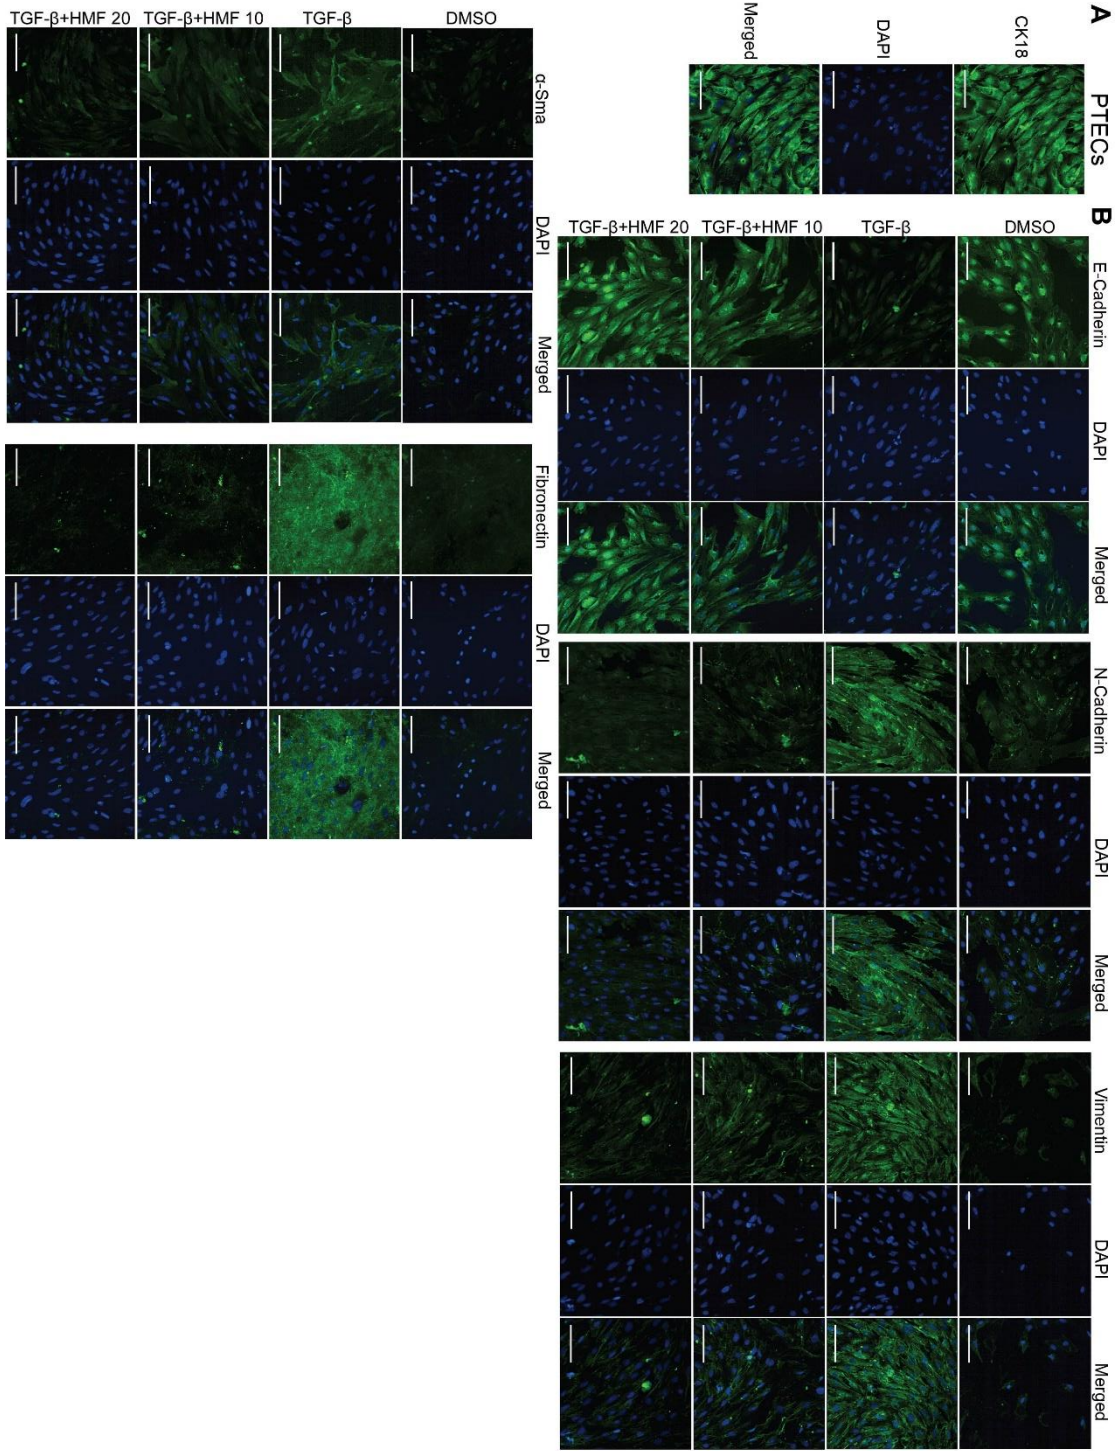

165 **Figure S13. HMF inhibited TGF- $\beta$ -induced EMT in PTECs. (A)**  
166 Immunofluorescent staining represents CK18 expressions in PTECs. Scale bar, 100  $\mu\text{m}$ ,  
167  $n = 3$  samples. **(B)** Immunofluorescent staining represents N-Cadherin, E-Cadherin,  
168 Vimentin,  $\alpha$ -Sma and Fibronectin expressions in PTECs 24 h after treatment with TGF-  
169  $\beta$  and in the presence of DMSO or HMF. Scale bar, 100  $\mu\text{m}$ ,  $n = 3$  samples.  
170

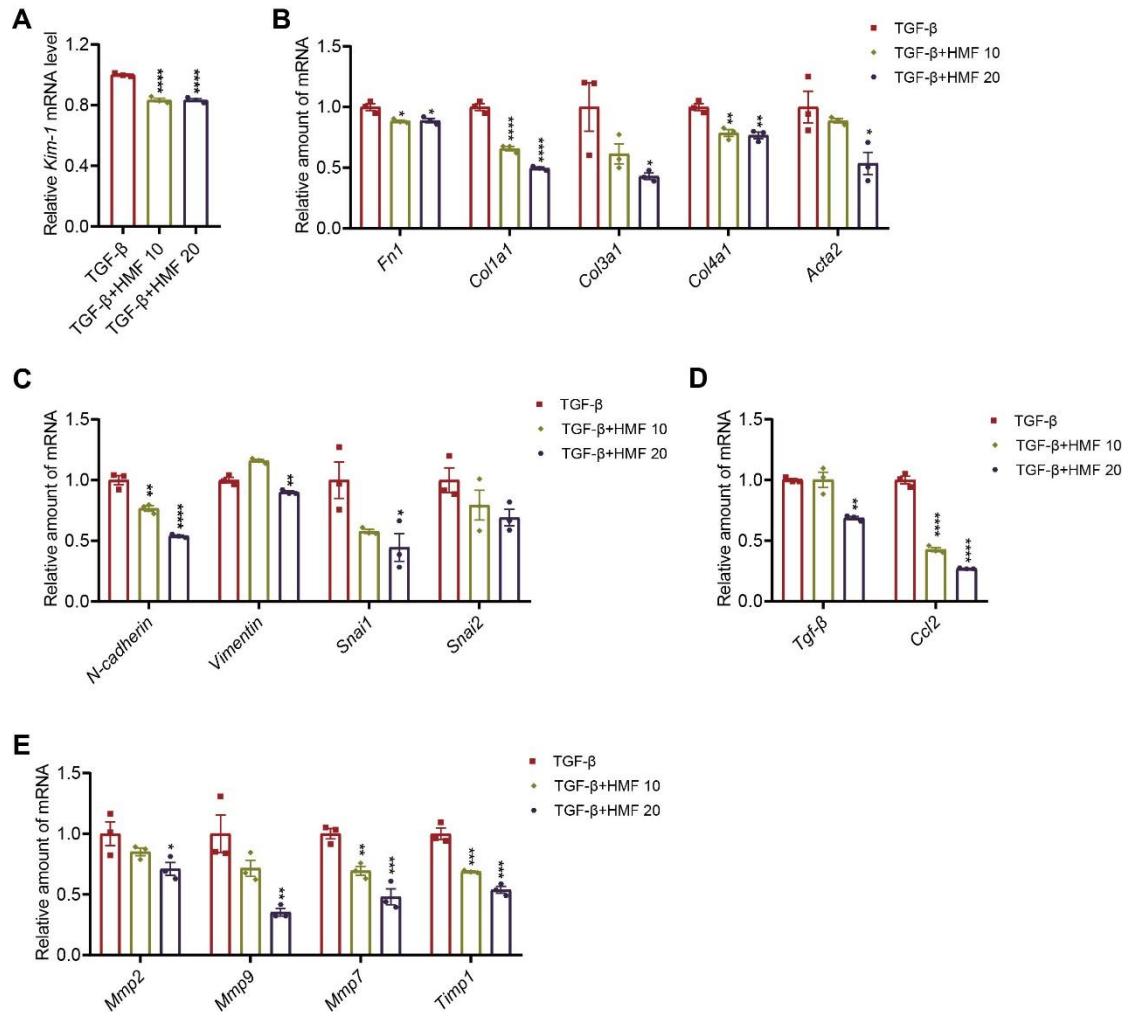

**Figure S14. HMF inhibited TGF-β-induced EMT, and the production of proinflammatory cytokines in PTECs.** (A-E) PTECs treated with TGF-β and in the presence of DMSO or HMF for 24 h. (A) *Kim-1* mRNA level in PTECs,  $n = 3$  biologically independent samples. (B-E) Relative ECM associated gene (B), EMT associated gene (C), chemokine associated gene (D), and extracellular matrix associated gene (E) mRNA level in PTECs,  $n = 3$  biologically independent samples. Error bars represent mean  $\pm$  SEM. Comparisons those among three or more groups by using one-way analysis of variance (ANOVA) followed by Dunnett's post hoc tests. \* $p < 0.05$ , \*\* $p < 0.01$ , \*\*\* $p < 0.001$ , \*\*\*\* $p < 0.0001$  versus the TGF-β group.

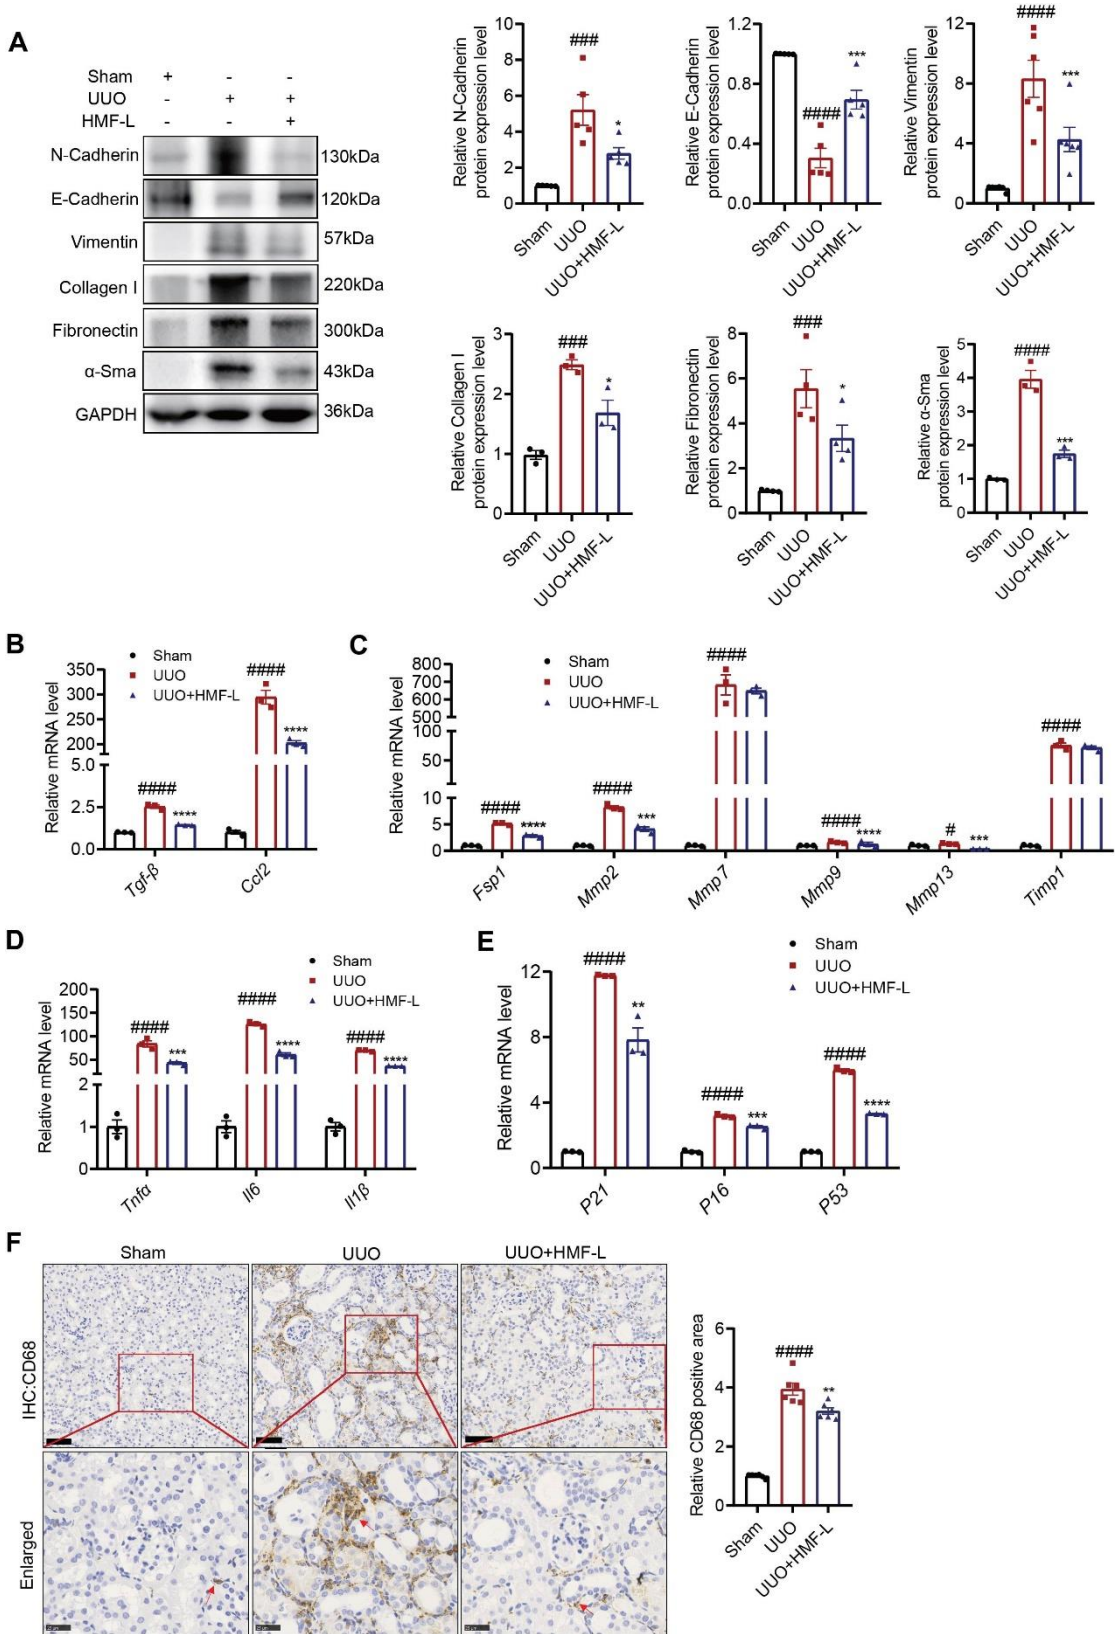

**Figure S15. HMF improved UUO-induced renal fibrosis in mice.** Vehicle, or HMF (50 or 100 mg/kg/day) was administrated to UUO mice by gastric irrigation once daily

for 10 days. UUO, unilateral ureteral obstruction. (A) Western blot (left panel) and quantification (right panel) of the protein expression of N-Cadherin, E-Cadherin, Vimentin, Collagen I, Fibronectin and  $\alpha$ -Sma in left kidneys, GAPDH served as loading control,  $n = 3$ -6 mice. (B-E) Relative mRNA level of chemokine-associated genes (B), extracellular matrix-associated genes (C), inflammation associated genes (D) and senescence-associated genes (E) were determined by RT-qPCR from left kidneys.  $n = 3$  biologically independent samples. (F) Immunohistochemistry staining analysis (left panel) and quantification (right panel) of CD68 expression in left kidney tissues,  $n = 6$  mice. Scale bar, 50  $\mu$ m. Error bars represent mean  $\pm$  SEM. Comparisons those among three or more groups by using one-way analysis of variance (ANOVA) followed by Dunnett's post hoc tests. \* $p < 0.05$ , \*\* $p < 0.01$ , \*\*\* $p < 0.001$ , \*\*\*\* $p < 0.0001$  versus the UUO group, ### $p < 0.001$ , #### $p < 0.0001$  versus the Sham group.

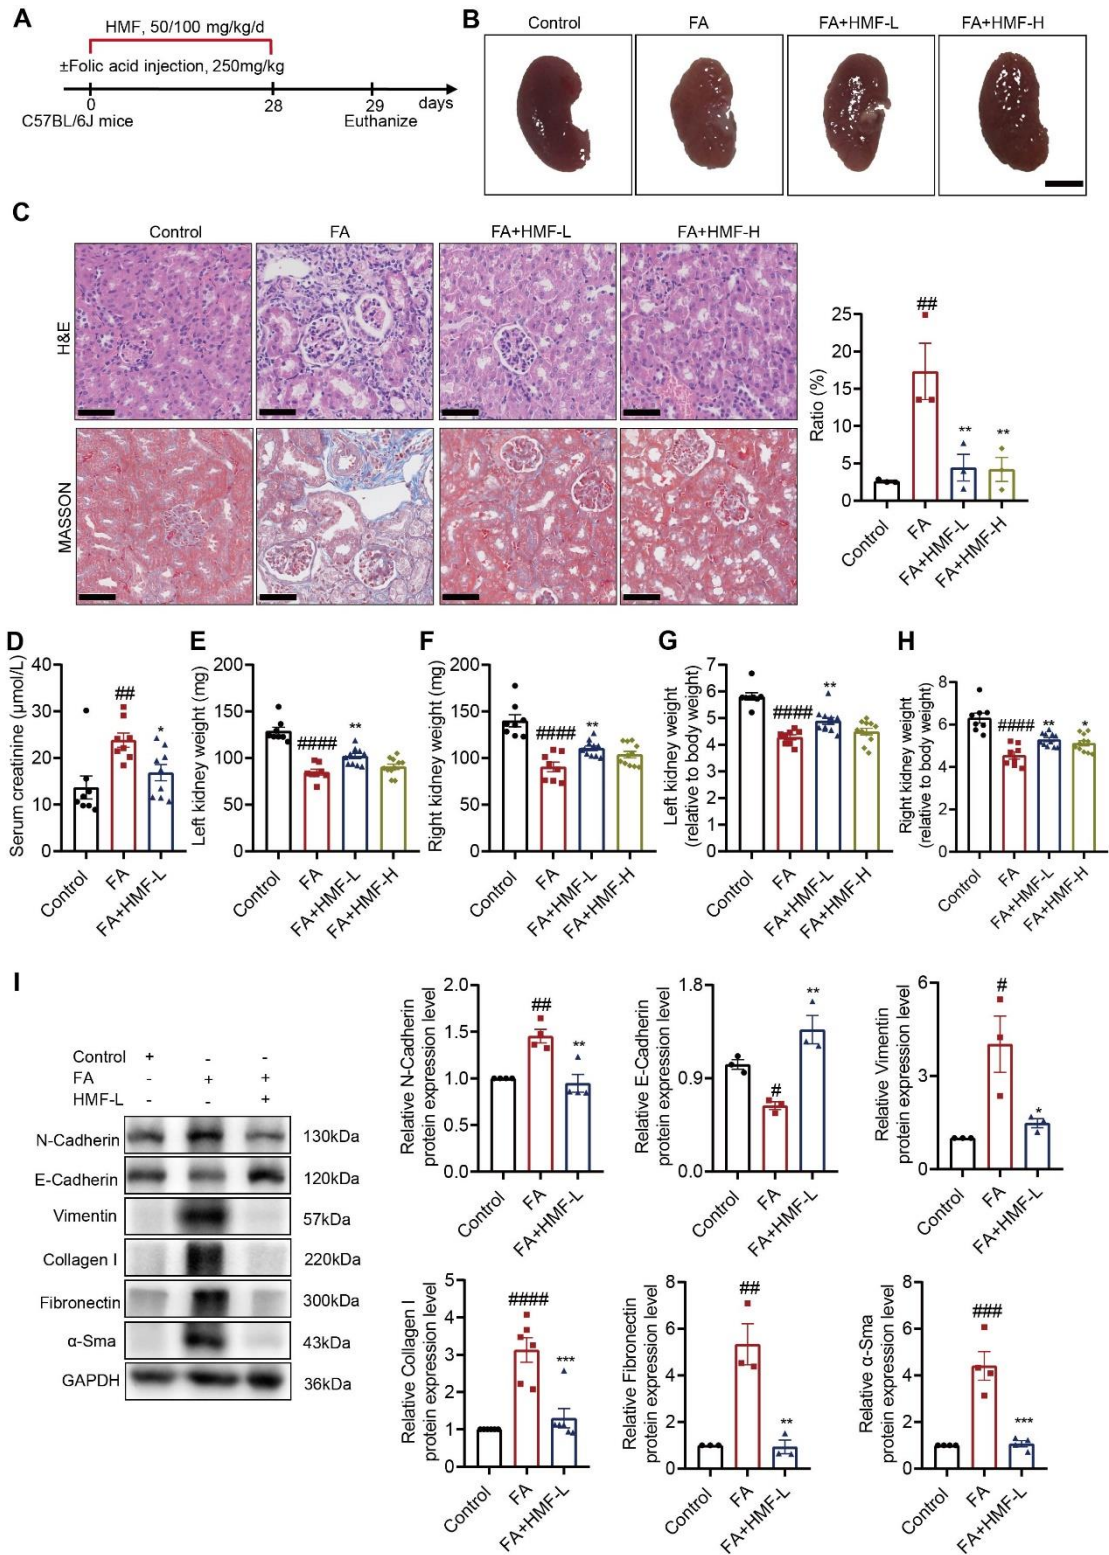

**Figure S16. HMF ameliorated FA-induced renal fibrosis in mice.** The mice were intraperitoneally injected with folic acid (250 mg/kg). Vehicle, or HMF (50 or 100 mg/kg/day) was administrated to folic acid mice by gastric irrigation once daily for 28 days. (A) Scheme of the experimental approach. (B) Representative picture of left

202 kidneys of mice with different treatments. (C) Representative photomicrographs of the  
 203 H&E staining and Masson's trichrome staining from left kidneys, renal interstitial  
 204 fibrosis scores based on Masson's trichrome staining (right panel),  $n = 3$  mice. Scale  
 205 bar, 50  $\mu\text{m}$ . (D) Creatinine in serum,  $n = 8-11$  mice. (E and F) The left (E) and right (F)  
 206 renal weight. (G and H) The ratio of left (G) and right (H) renal weight to body weight  
 207 (BW),  $n = 8-11$  mice. (I) Western blot (left panel) and quantification (right panel) of the  
 208 protein expression of N-Cadherin, E-Cadherin, Vimentin, Collagen I, Fibronectin and  
 209  $\alpha$ -Sma in left kidneys, GAPDH served as loading control,  $n = 3-6$  mice. Error bars  
 210 represent mean  $\pm$  SEM. Comparisons those among three or more groups by using one-  
 211 way analysis of variance (ANOVA) followed by Dunnett's post hoc tests.  $*p < 0.05$ ,  
 212  $**p < 0.01$ ,  $***p < 0.001$  versus the FA group,  $^{\#}p < 0.05$ ,  $^{\#\#}p < 0.01$ ,  $^{\#\#\#}p < 0.001$ ,  
 213  $^{\#\#\#\#}p < 0.0001$  versus the Control group.

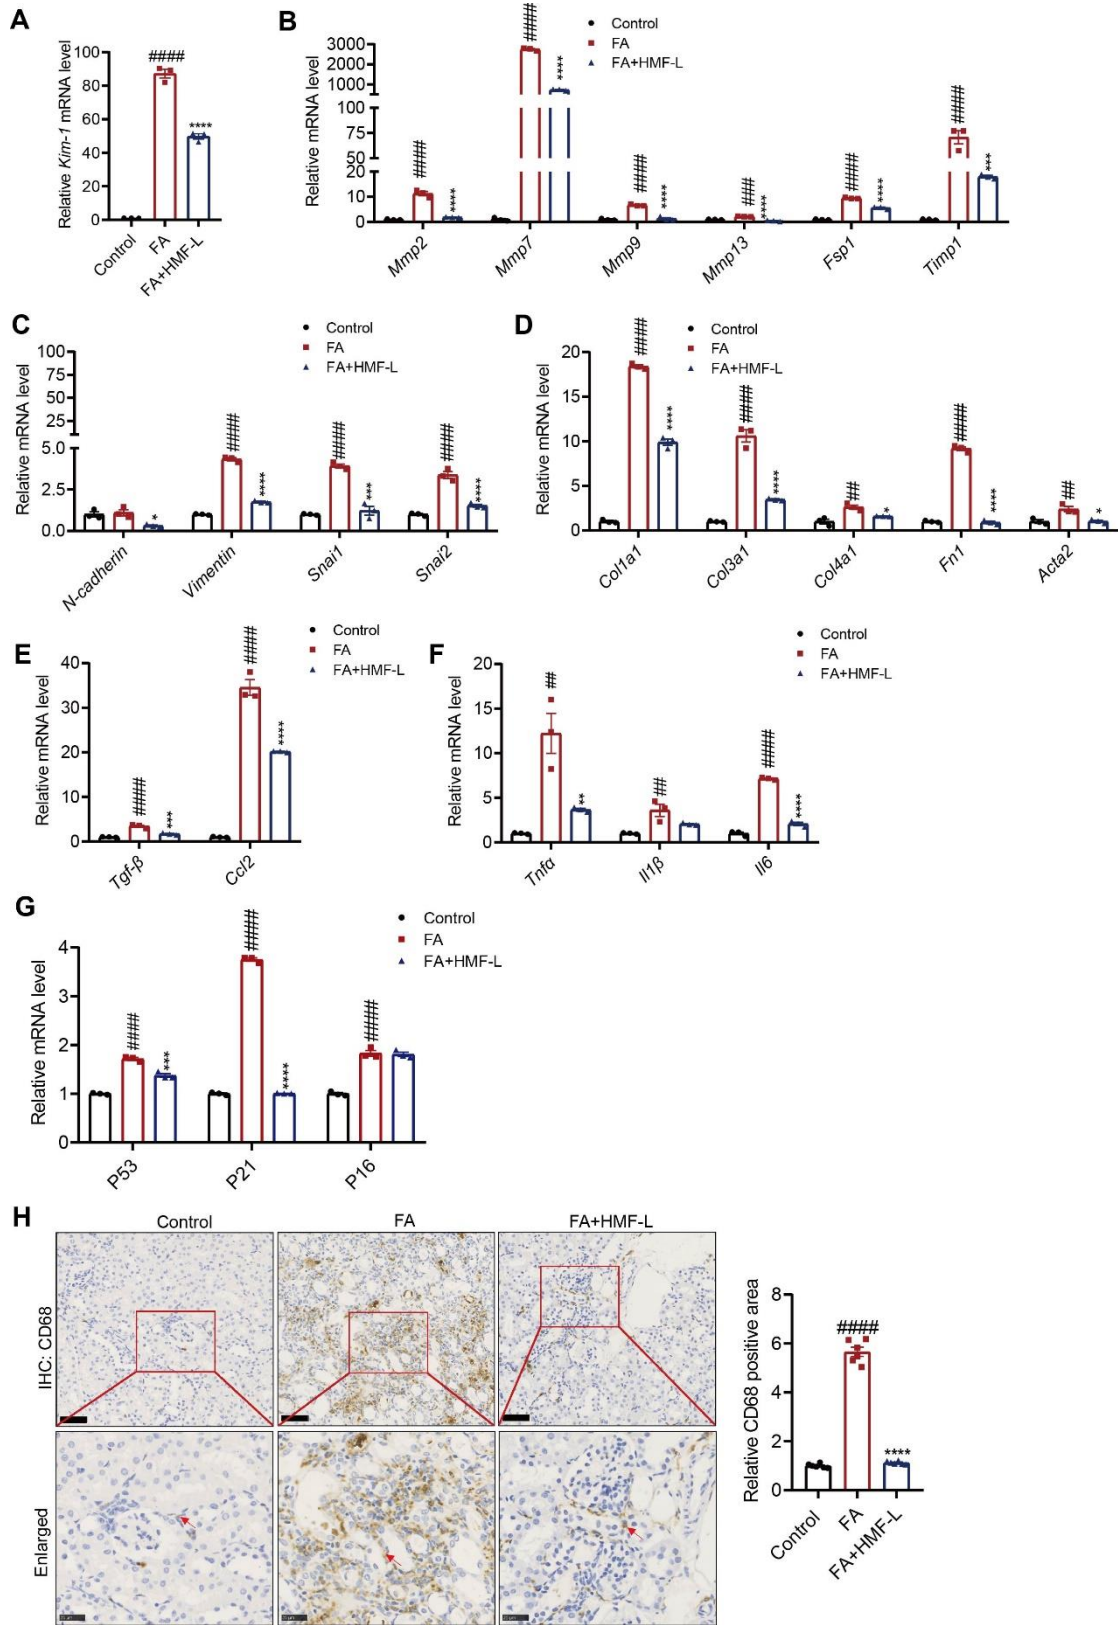

**Figure S17. HMF inhibited FA-induced EMT, the production of proinflammatory cytokines, and macrophage infiltration in mice. The mice were intraperitoneally**

217 injected with folic acid (250 mg/kg). Vehicle, or HMF (50 or 100 mg/kg/day) was  
218 administrated to folic acid mice by gastric irrigation once daily for 28 days. (A) *Kim-1*  
219 mRNA level in left kidneys,  $n = 3$  mice. (B-G) Relative extracellular matrix associated  
220 gene (B), EMT associated gene (C), ECM associated gene (D), chemokine associated  
221 gene (E), inflammation associated gene (F) and senescence-associated genes (G)  
222 mRNA level in left kidneys,  $n = 3$  mice. (H) Immunohistochemistry staining analysis  
223 (left panel) and quantification (right panel) of CD68 expression in kidney tissues,  $n = 6$   
224 mice. Scale bar, 50  $\mu\text{m}$ . Error bars represent mean  $\pm$  SEM. Comparisons those among  
225 three or more groups by using one-way analysis of variance (ANOVA) followed by  
226 Dunnett's post hoc tests.  $*p < 0.05$ ,  $**p < 0.01$ ,  $***p < 0.001$ ,  $****p < 0.0001$  versus the FA  
227 group,  $^{##}p < 0.01$ ,  $^{###}p < 0.001$ ,  $^{####}p < 0.0001$  versus the Control group.

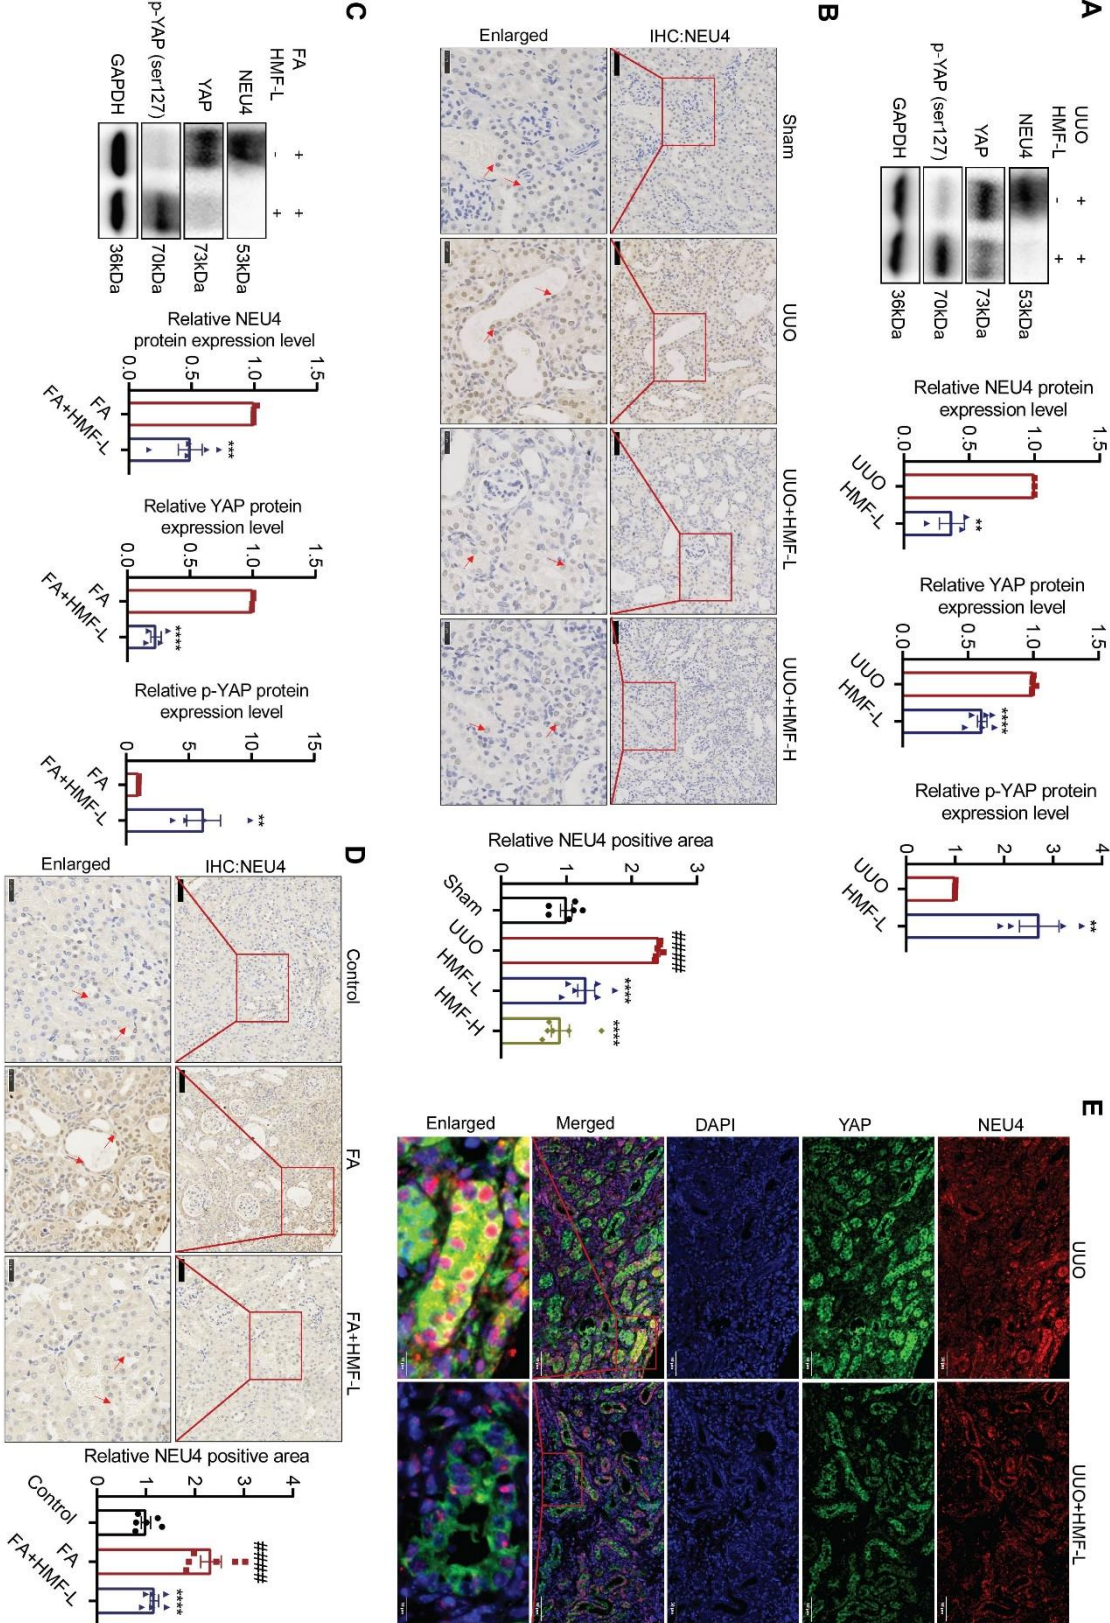

229 **Figure S18. HMF inhibited the interaction between NEU4 with YAP, and**  
 230 **activation of YAP in UUO or folic acid-induced mice. (A)** Western blot (left panel)  
 231 and quantification (right panel) of the protein expression of NEU4, YAP and  
 232 phosphorylation of YAP in left kidneys. GAPDH served as loading control,  $n = 3-5$   
 233 mice. **(B)** Immunohistochemistry staining analysis (left panel) and quantification (right  
 234 panel) of NEU4 in left kidney tissues.  $n = 6$  mice. Scale bar, 50  $\mu\text{m}$ . **(C)** Western blot  
 235 (left panel) and quantification (right panel) of the protein expression of NEU4, YAP and  
 236 phosphorylation of YAP in kidneys. GAPDH served as loading control,  $n = 3-5$  mice.  
 237 **(D)** Immunohistochemistry staining analysis (left panel) and quantification (right panel)  
 238 of NEU4 in kidney tissues.  $n = 6$  mice. Scale bar, 50  $\mu\text{m}$ . **(E)** Colocalization of NEU4  
 239 and YAP was analyzed by immunofluorescence in left kidneys. Scale bar, 50  $\mu\text{m}$ .  $n = 6$   
 240 mice. **(A, B and E)** Vehicle, or HMF (50 or 100 mg/kg/day) was administrated to UUO  
 241 mice by gastric irrigation once daily for 10 days. **(C and D)** The mice were  
 242 intraperitoneally injected with folic acid (250 mg/kg). Vehicle, or HMF (50 or 100  
 243 mg/kg/day) was administrated to folic acid mice by gastric irrigation once daily for 28  
 244 days. Error bars represent mean  $\pm$  SEM. Comparisons between two groups were  
 245 analyzed by using a two-tailed Student's  $t$  test. Comparisons those among three or more  
 246 groups by using one-way analysis of variance (ANOVA) followed by Dunnett's post  
 247 hoc tests.  $**p < 0.01$ ,  $***p < 0.001$ ,  $****p < 0.0001$  versus the UUO or FA group,  
 248  $#####p < 0.0001$  versus the Sham or Control group.

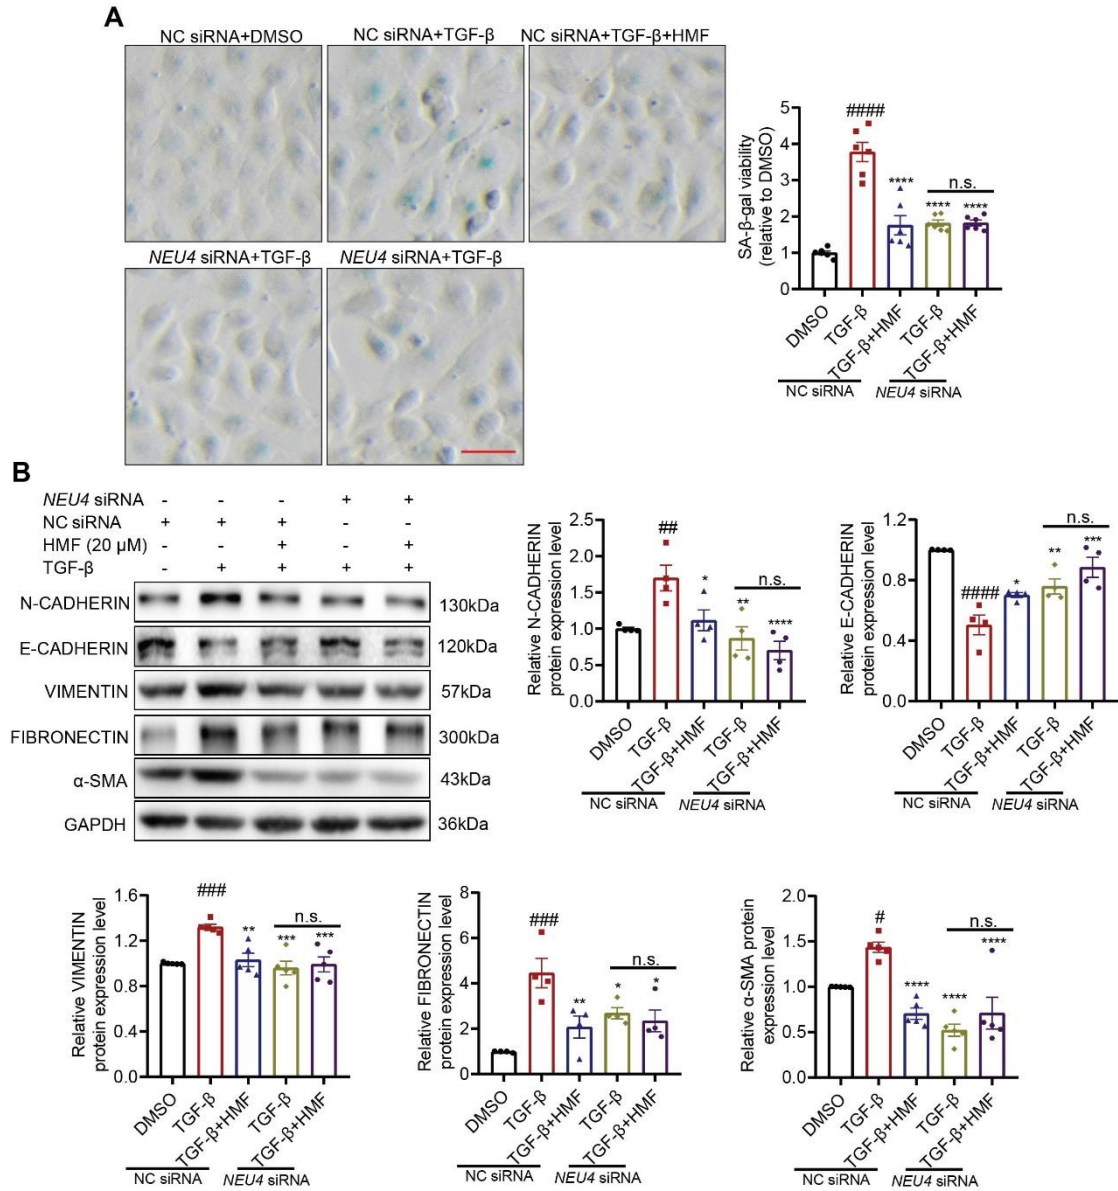

**Figure S19. NEU4 knockdown abolished the anti-fibrotic effect of HMF in HK-2.** HK-2 cells treatment with TGF- $\beta$  and in the presence of DMSO or HMF 24 h after transfection with *NEU4* siRNA. (A) Measurement (left panel) and quantification (right panel) of SA- $\beta$ -gal activity by SA- $\beta$ -gal staining in HK-2 cells,  $n = 6$  biologically independent samples. Scale bar, 100  $\mu$ m. (B) Western blot (left panel) and quantification (right panel and bottom panel) of the protein expression of N-CADHERIN, E-CADHERIN, VIMENTIN, FIBRONECTIN and  $\alpha$ -SMA in HK-2 cells. GAPDH served as loading control.  $n = 4$ -5 biologically independent samples. Error bars represent mean  $\pm$  SEM. Comparisons those among three or more groups by using one-way analysis of variance (ANOVA) followed by Dunnett's post hoc tests. \* $p < 0.05$ , \*\* $p < 0.01$ ,

260 \*\*\* $p < 0.001$ , \*\*\*\* $p < 0.0001$  versus the NC siRNA+TGF- $\beta$  group, # $p < 0.05$ , ## $p < 0.01$ ,  
261 ### $p < 0.001$ , #### $p < 0.0001$  versus the NC siRNA+DMSO group. n.s.: no significance.

262

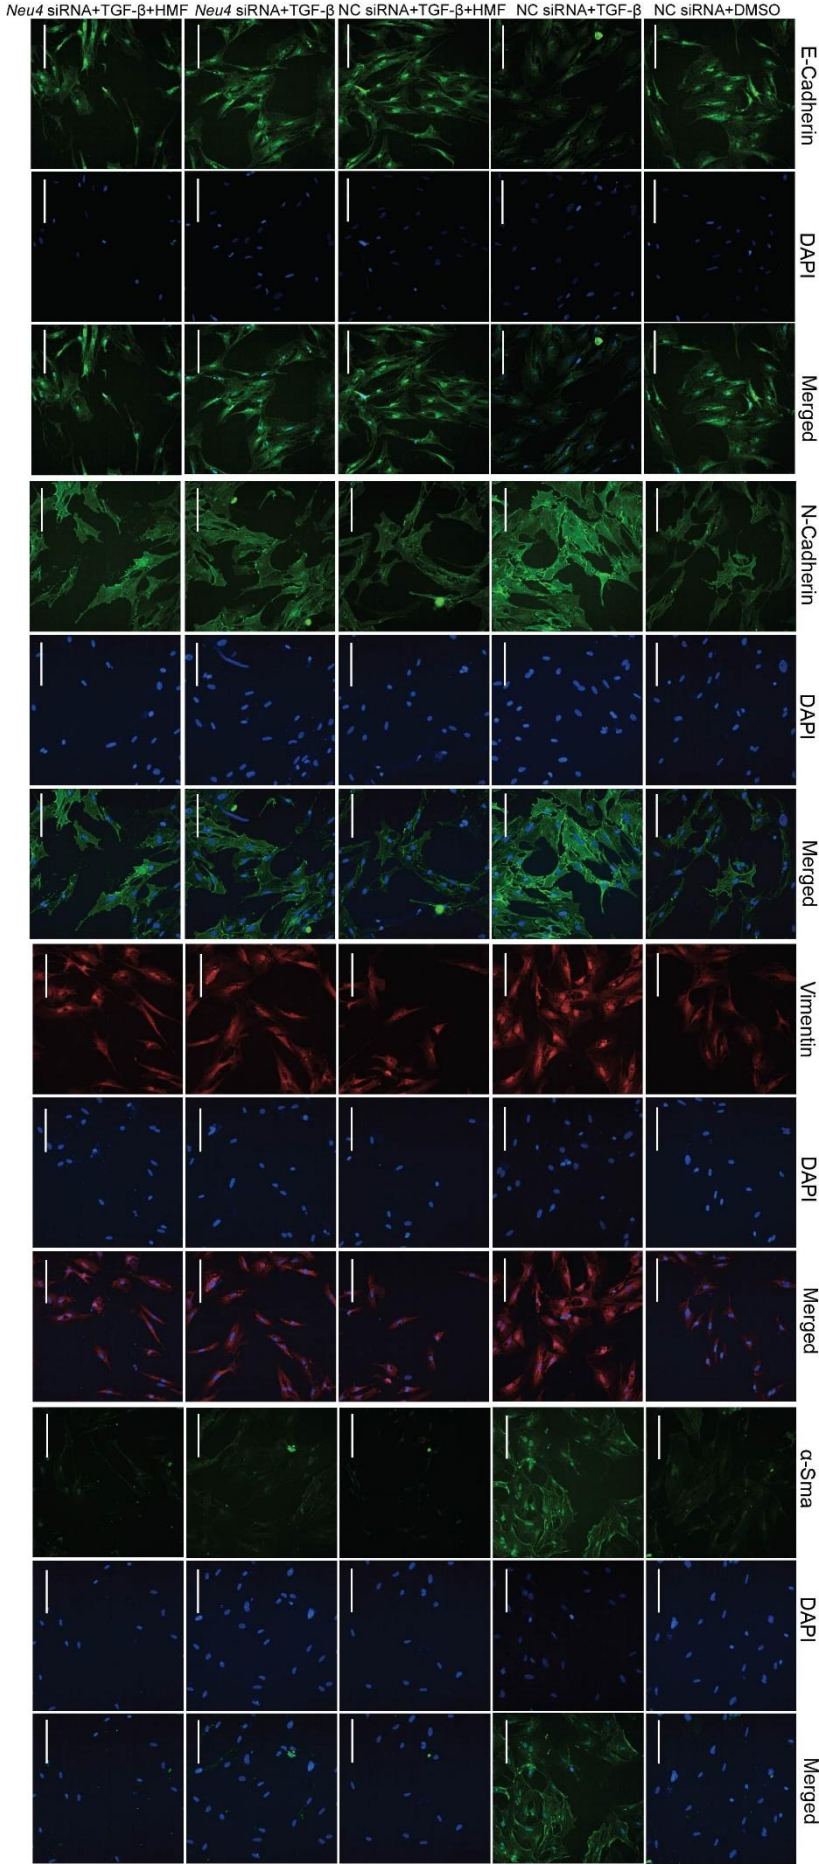

**Figure S20. Knockdown of NEU4 abolished the anti-fibrotic effect of HMF in PTECs.** Immunofluorescent staining represents N-Cadherin, E-Cadherin, Vimentin and  $\alpha$ -Sma expressions in PTECs treatment with TGF- $\beta$  and in the presence of DMSO or HMF 24 h after transfection with *NEU4* siRNA.  $n = 3$  biologically independent samples. Scale bar, 100  $\mu$ m.

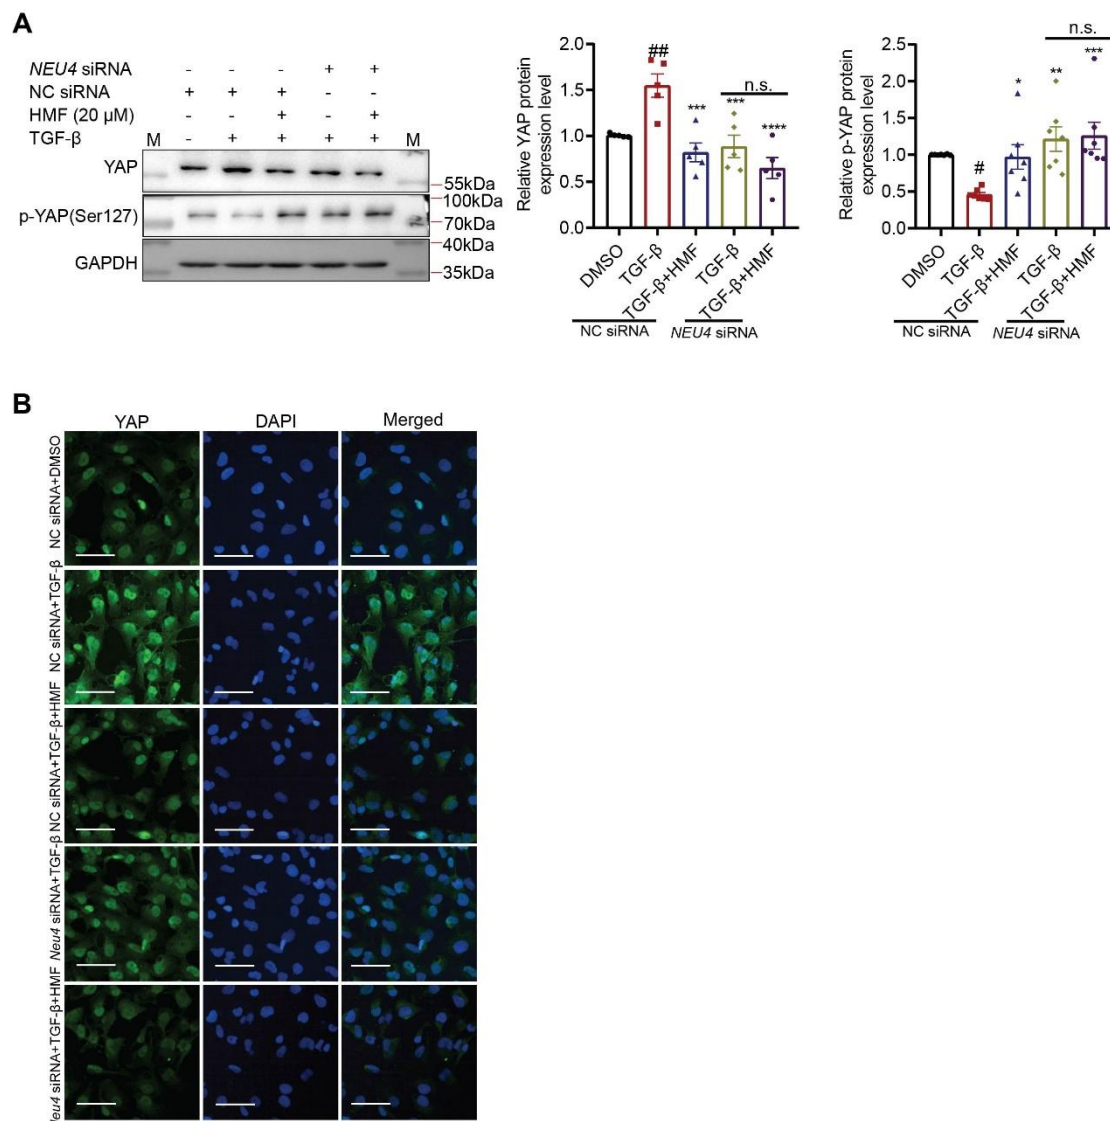

**Figure S21. NEU4 knockdown abolished the downregulation of YAP by HMF.** HK-2 cells treatment with TGF- $\beta$  and in the presence of DMSO or HMF 24 h after transfection with *NEU4* siRNA. (A) Western blot (left panel) and quantification (right panel) of the protein expression of YAP and phosphorylation of YAP in HK-2 cells. GAPDH served as loading control.  $n = 5-7$  biologically independent samples. M, Marker. (B) Immunofluorescent staining represents YAP expressions in HK-2 cells treatment with TGF- $\beta$  and in the presence of DMSO or HMF 24 h after transfection with *NEU4* siRNA. Scale bar, 100  $\mu$ m,  $n = 3$  samples. Error bars represent mean  $\pm$  SEM. Comparisons those among three or more groups by using one-way analysis of variance (ANOVA) followed by Dunnett's post hoc tests. \* $p < 0.05$ , \*\* $p < 0.01$ , \*\*\* $p < 0.001$ , \*\*\*\* $p < 0.0001$  versus the NC siRNA+TGF- $\beta$  group, # $p < 0.05$ , ## $p < 0.001$  versus the NC siRNA+DMSO group. n.s.: no significance.

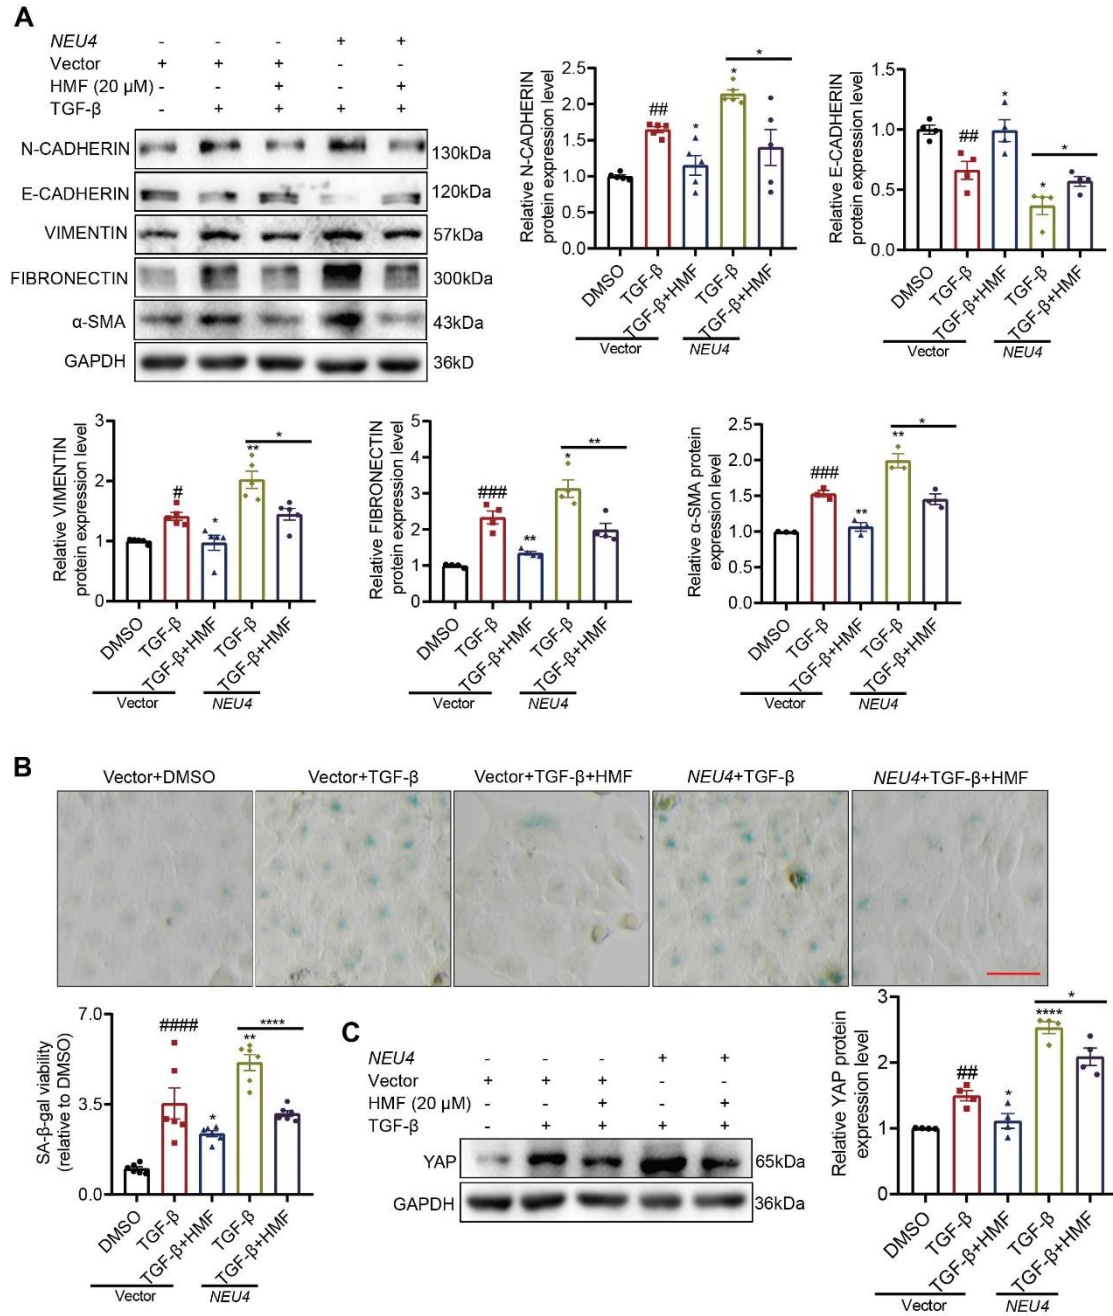

**Figure S22. HMF ameliorated TGF- $\beta$ -induced EMT and cellular senescence is dependent on NEU4 in HK-2.** HK-2 cells treated with TGF- $\beta$  and in the presence of DMSO or HMF 24 h after transfection with *NEU4*-overexpression plasmids. (A) Western blot (left panel) and quantification (right panel and bottom panel) of the protein expression of N-CADHERIN, E-CADHERIN, VIMENTIN, FIBRONECTIN and  $\alpha$ -SMA in HK-2 cells. GAPDH served as loading control.  $n = 3$ -6 biologically independent samples. (B) Measurement (top panel) and the quantification (bottom panel) of SA- $\beta$ -gal activity by SA- $\beta$ -gal staining in HK-2 cells.  $n = 6$  biologically

289 independent samples. Scale bar, 100  $\mu\text{m}$ . (C) Western blot (left panel) and  
290 quantification (right panel) of the protein expression of YAP in HK-2 cells, GAPDH  
291 served as loading control,  $n = 4$  biologically independent samples. Error bars represent  
292 mean  $\pm$  SEM. Comparisons those among three or more groups by using one-way  
293 analysis of variance (ANOVA) followed by Dunnett's post hoc tests.  $*p < 0.05$ ,  $**p < 0.01$ ,  
294  $****p < 0.0001$  versus the Vector+TGF- $\beta$  or *NEU4*+TGF- $\beta$  group,  $\#p < 0.05$ ,  $##p < 0.001$ ,  
295  $###p < 0.01$ ,  $####p < 0.0001$  versus the Vector+DMSO group.

296

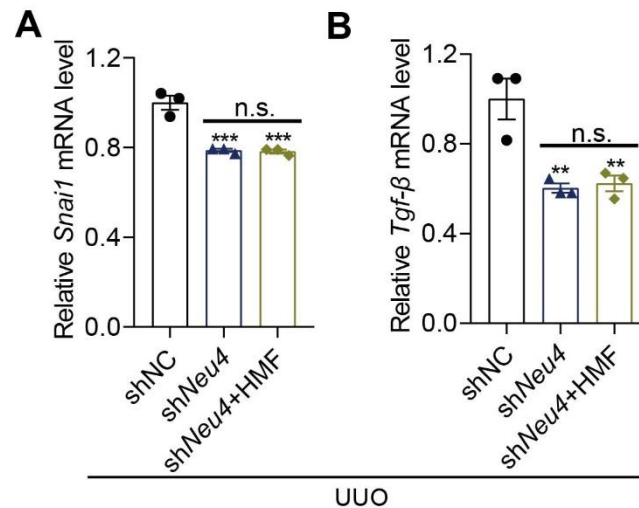

**Figure S23. *Neu4* knockdown relieved *Snai1* and *Tgf-β* inhibition effect of HMF in UUO model.** Six-week-old male C57BL/6J mice were injected with shNC or sh*Neu4* adenoviruses. Five weeks after injection, the mice were subjected to UUO surgery, then vehicle or HMF (50 mg/kg/day) was administrated to mice by gastric irrigation once daily for 10 days. (**A** and **B**) Relative EMT associated gene mRNA level in left kidneys,  $n = 3$  mice. Error bars represent mean  $\pm$  SEM. Comparisons those among three or more groups by using one-way analysis of variance (ANOVA) followed by Dunnett's post hoc tests. \*\* $p < 0.01$ , \*\*\* $p < 0.001$  versus the shNC group. n.s.: no significance.

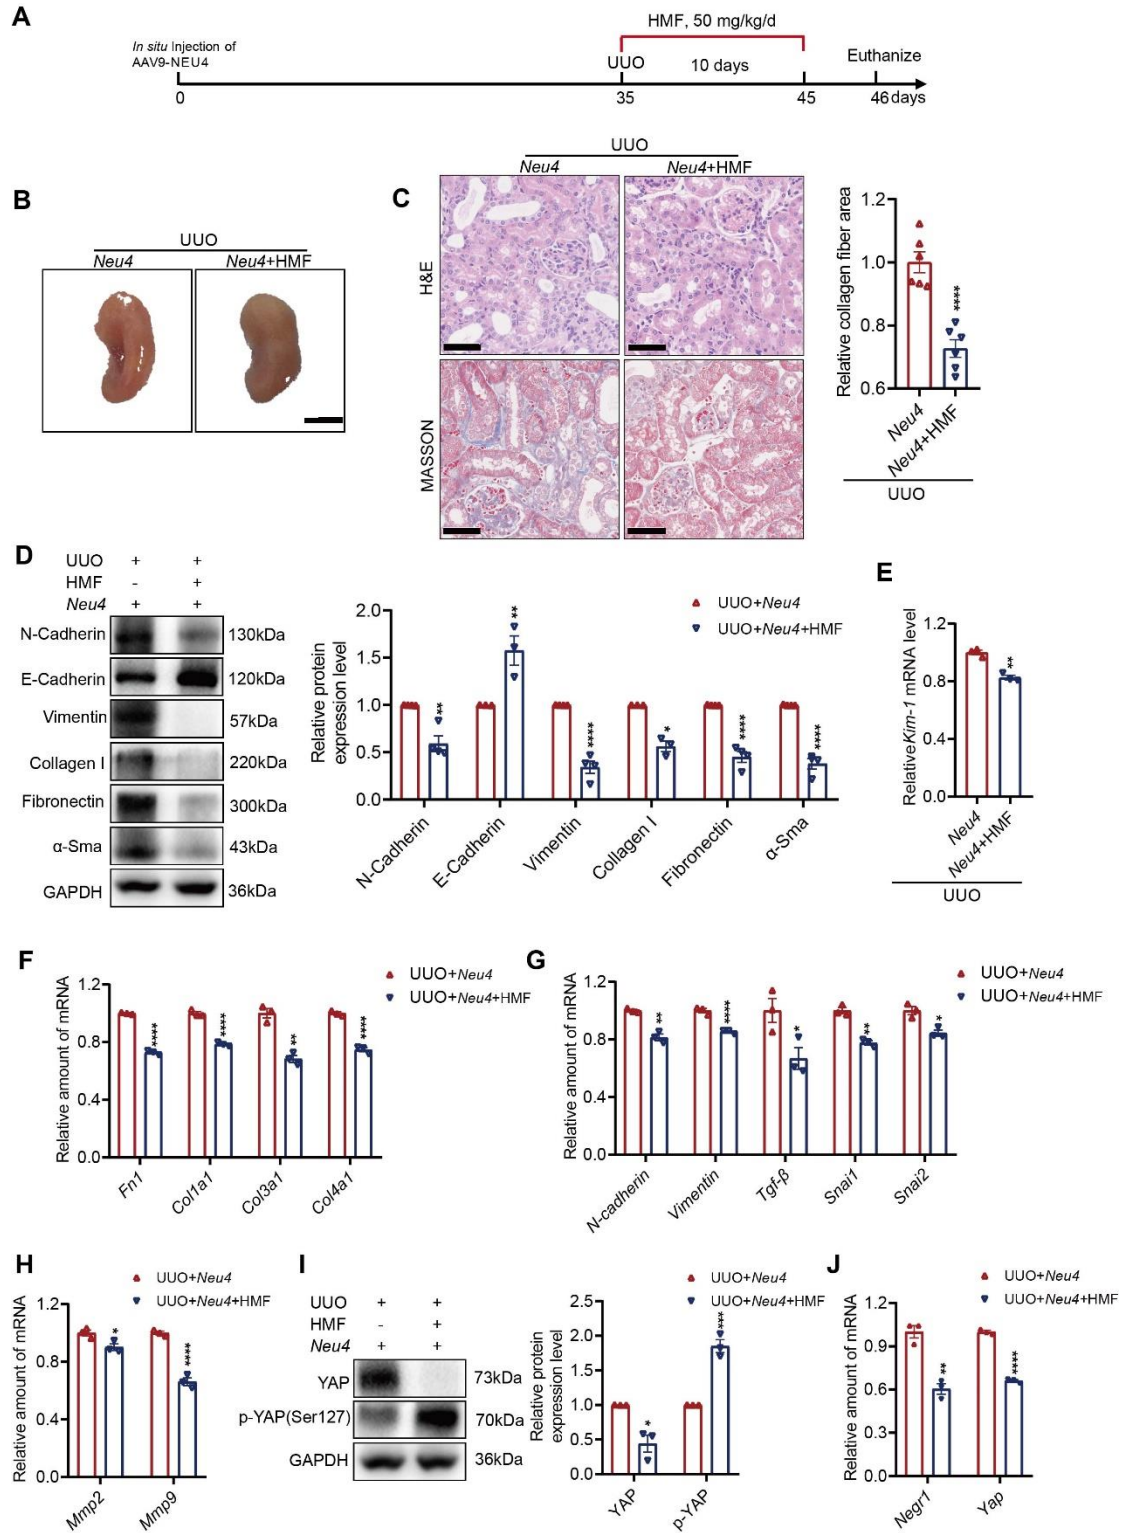

**Figure S24. Relief of renal fibrosis by HMF was dependent on NEU4.** Mice was *in situ* injected with AAV9 encoding GFP-*Neu4*. Five weeks after injection, the mice were subjected to UUO surgery, then vehicle or HMF (50 mg/kg/day) was administrated to mice by gastric irrigation once daily for 10 days. (A) The schematic of experimental

311 design. **(B)** Representative picture of left kidneys of UUO mice. Scale bar, 100  $\mu$ m, *n*  
 312 = 3 mice. **(C)** Representative photomicrographs of the H&E staining and Masson's  
 313 trichrome staining from left kidneys of UUO mice (left panel), and renal interstitial  
 314 fibrosis scores based on Masson's trichrome staining (right panel). *n* = 6 mice. H&E  
 315 staining, scale bar, 50  $\mu$ m. Masson's trichrome staining, scale bar, 100  $\mu$ m. **(D)** Western  
 316 blot (left panel) and quantification (right panel) of the protein expression of N-Cadherin,  
 317 E-Cadherin, Vimentin, Collagen I, Fibronectin and  $\alpha$ -Sma in kidneys, GAPDH served  
 318 as loading control. *n* = 3-4 mice. **(E)** *Kim-1* gene mRNA level in left kidneys. *n* = 3  
 319 mice. **(F-H)** Relative ECM associated gene **(F)**, EMT associated gene **(G)**, extracellular  
 320 matrix associated gene **(H)** mRNA level in left kidneys. *n* = 3 mice. **(I)** Western blot  
 321 (left panel) and quantification (right panel) of the protein expression of YAP and  
 322 phosphorylation of YAP in kidneys. GAPDH served as loading control, *n* = 3 mice. **(J)**  
 323 Relative mRNA abundance of *Yap* target genes in left kidney tissue, *n* = 3 mice. Error  
 324 bars represent mean  $\pm$  SEM. Comparisons between two groups were analyzed by using  
 325 a two-tailed Student's *t* test. \**p*<0.05, \*\**p*<0.01, \*\*\**p*<0.001, \*\*\*\**p*<0.0001 versus the  
 326 *Neu4* group.
